# Supplementary material
Source: PubMed Central journal article supplement (PMC10260956)
Supplement: 41598_2023_36002_MOESM1_ESM.pdf [file 41598_2023_36002_MOESM1_ESM.pdf]

**Genome-wide genetic variation and molecular surveillance of drug resistance in *Plasmodium falciparum* isolates from asymptomatic individuals in Ouélessébougou, Mali.**

Leen N. Vanheer<sup>1</sup>, Almahamoudou Mahamar<sup>2</sup>, Emilia Manko<sup>1</sup>, Sidi M. Niambele<sup>2</sup>, Koualy Sanogo<sup>2</sup>, Ahamadou Youssouf<sup>2</sup>, Adama Dembele<sup>2</sup>, Makonon Diallo<sup>2</sup>, Seydina O. Maguiraga<sup>2</sup>, Jody Phelan<sup>1</sup>, Ashley Osborne<sup>1</sup>, Anton Spadar<sup>1</sup>, Merel J. Smit<sup>3</sup>, Teun Bousema<sup>3</sup>, Chris Drakeley<sup>1</sup>, Taane G. Clark<sup>1,4</sup>, William Stone<sup>1</sup>, Alassane Dicko<sup>2</sup>, Susana Campino<sup>1</sup>

<sup>1</sup> Faculty of Infectious and Tropical Diseases, London School of Hygiene & Tropical Medicine, London, UK

<sup>2</sup> Malaria Research and Training Centre, Faculty of Pharmacy and Faculty of Medicine and Dentistry, University of Sciences Techniques and Technologies of Bamako, Bamako, Mali

<sup>3</sup> Department of Medical Microbiology and Radboud Center for Infectious Diseases, Radboud University Medical Center, Nijmegen, Netherlands

<sup>4</sup> Faculty of Epidemiology and Population Health, London School of Hygiene & Tropical Medicine, London, UK

Corresponding authors

Dr. Leen Vanheer and Prof. Susana Campino

Department of Infection Biology

London School of Hygiene & Tropical Medicine,

London WC1E 7HT, UK

leen.vanheer@lshtm.ac.uk, susana.campino@lshtm.ac.uk

## SUPPLEMENTAL FIGURES

**Supplemental Figure S1. Sampling sites in Ouélessébougou.** Location of 11 sample sites (red dots) in Ouélessébougou and surrounding villages where *P. falciparum* blood samples were collected in 2019 and 2020. This map was generated using the *ggmap* R package (version 3.0.0; <https://github.com/dkahle/ggmap>).

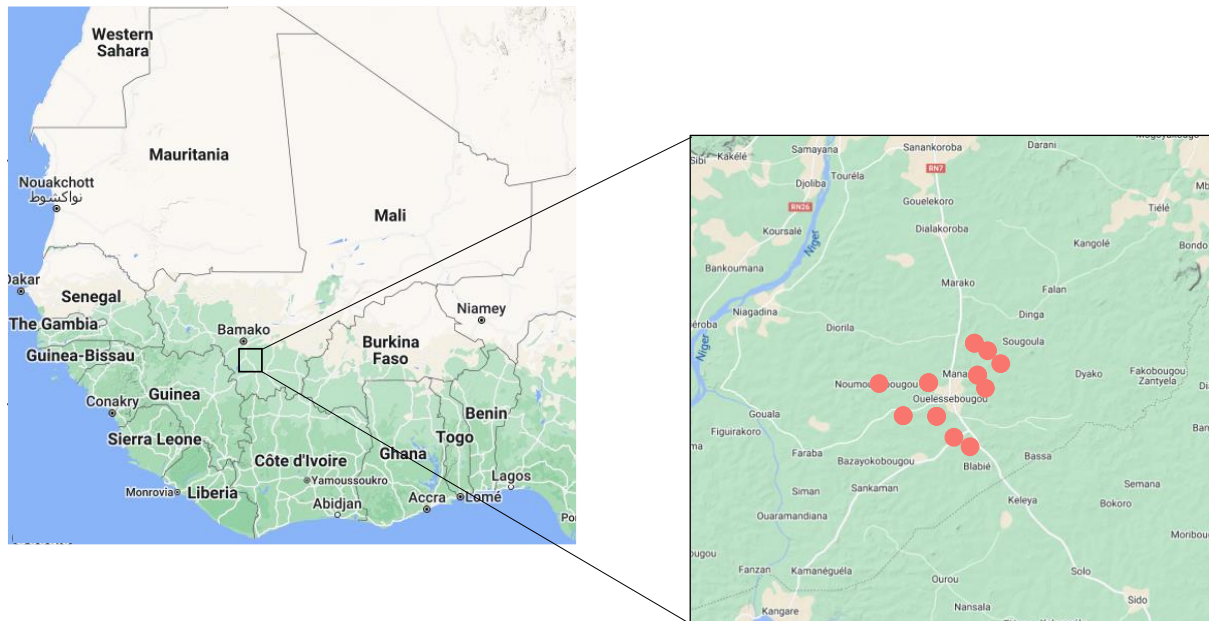

**Supplemental Figure S2. Pairwise Identity-by-descent (IBD)-fractions across country-level populations of *P. falciparum* isolates.** Isolates with  $F_{ws} > 0.85$  were incorporated in the analysis and include isolates from Mali 2007-2014 (67), Mali 2015-2017 (97), Mali 2019-2020 (87), Mauritania (79), Gambia (80), Cameroon (99), DRC (98), Malawi (97), Madagascar (22), Tanzania (120), Kenya (91) and Ethiopia (25) populations. All boxplots consist of boxes (median and interquartile range) and whiskers that extend to the most extreme data point which is no more than 1.5 times the interquartile range from the box.

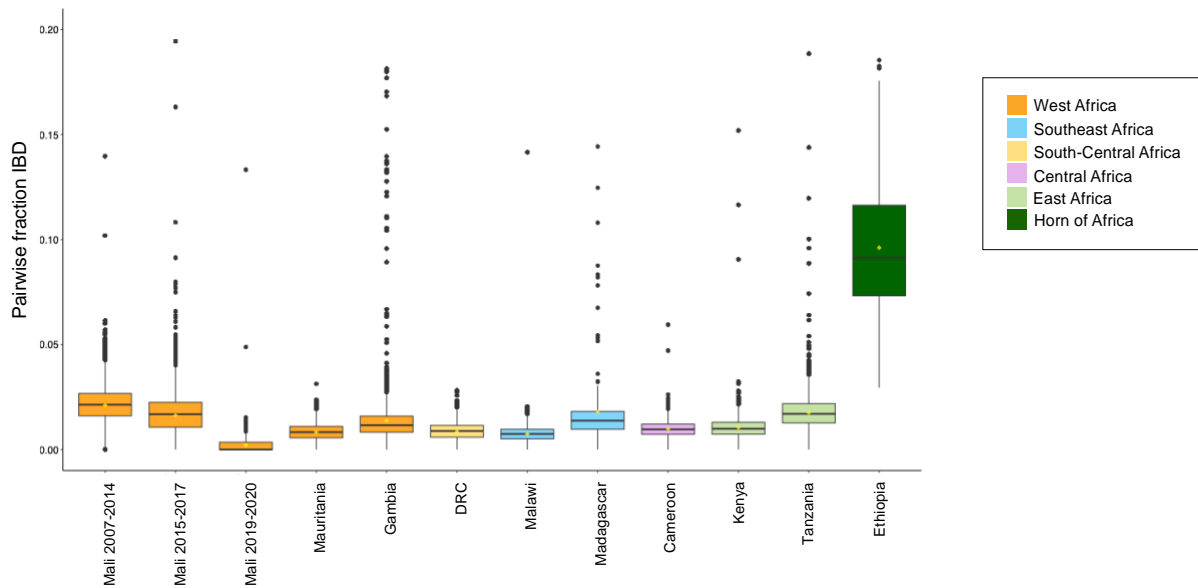

**Supplemental Figure S3. Genome-wide distribution of pairwise identity-by-descent (IBD) fractions across country-level populations of *P. falciparum* isolates.** Isolates with  $F_{ws} > 0.85$  were incorporated in the analysis and include isolates from Mali 2007-2014 (67), Mali 2015-2017 (97), Mali 2019-2020 (87), Mauritania (79), Gambia (80), Cameroon (99), DRC (98), Malawi (97), Madagascar (22), Tanzania (120), Kenya (91) and Ethiopia (25) populations. Top 5% of genomic regions for the Mali 2019-2020 population are presented in Supplemental Table S4.

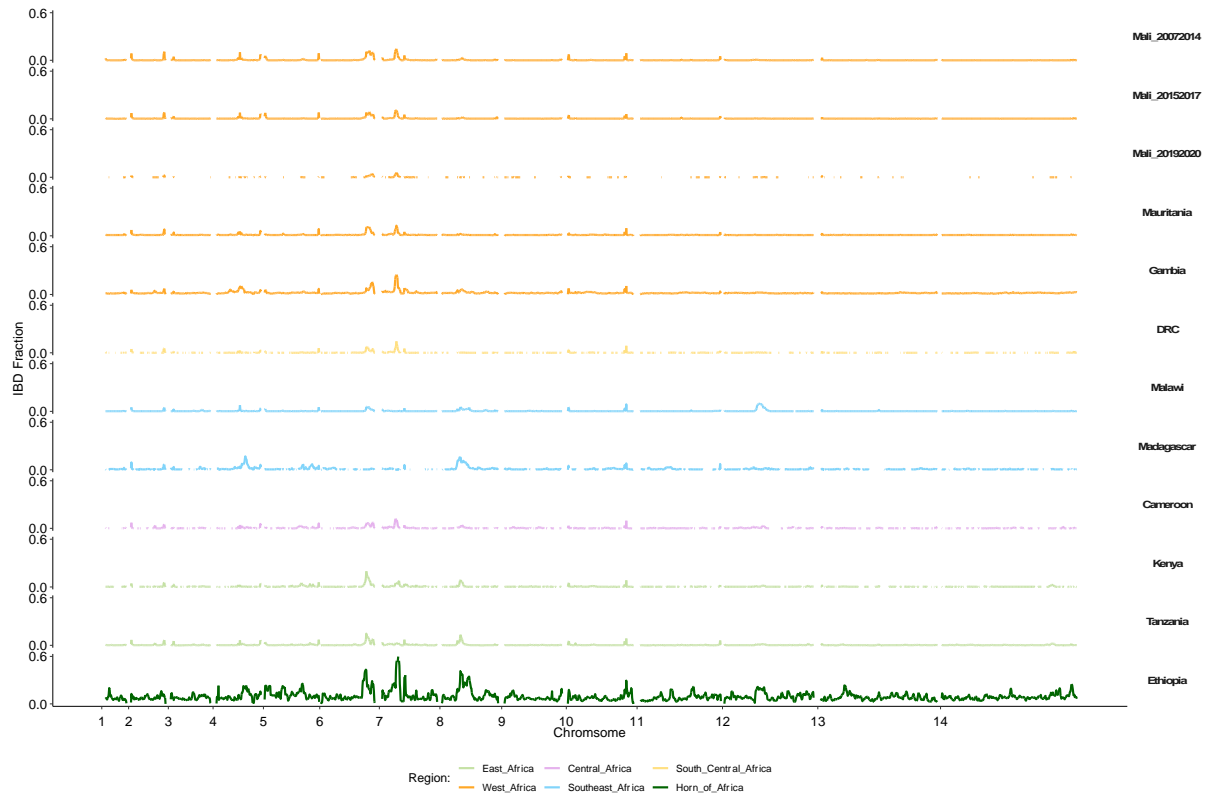

## SUPPLEMENTAL TABLES

**Supplemental Table ST1. Non-synonymous single nucleotide polymorphisms in genes associated with drug resistance.** Positions with minor allele frequency (MAF) of at least 2% were retained in this table. Frequencies are presented for each sampling year in Mali.

| Gene      | Gene ID       | Chromosome | Nt change | AA change | MAF 2007 (%)<br>n=74 | MAF 2012 (%)<br>n=4 | MAF 2013 (%)<br>n=284 | MAF 2014 (%)<br>n=52 | MAF 2015 (%)<br>n=84 | MAF 2016 (%)<br>n=342 | MAF 2017 (%)<br>n=36 | MAF 2019 (%)<br>n=51 | MAF 2020 (%)<br>n=36 |      |      |
|-----------|---------------|------------|-----------|-----------|----------------------|---------------------|-----------------------|----------------------|----------------------|-----------------------|----------------------|----------------------|----------------------|------|------|
| MDR1      | PF3D7_0523000 | 5          | 957990A>G | K34R      | 0.00                 | 33.33               | 1.06                  | 0.00                 | 1.20                 | 0.44                  | 1.39                 | 2.17                 | 0.00                 |      |      |
|           |               |            | 958145A>T | N86Y      | 28.38                | 0.00                | 19.72                 | 25.00                | 11.31                | 12.17                 | 11.11                | 6.25                 | 3.57                 |      |      |
|           |               |            | 958440A>T | Y184F     | 66.22                | 66.67               | 67.61                 | 67.31                | 66.27                | 64.56                 | 72.22                | 62.50                | 71.43                |      |      |
|           |               |            | 958496C>T | P203S     | 0.00                 | 0.00                | 0.53                  | 0.00                 | 1.20                 | 0.29                  | 2.86                 | 1.06                 | 0.00                 |      |      |
|           |               |            | 959087A>T | S400C     | 0.00                 | 0.00                | 0.00                  | 0.00                 | 0.00                 | 0.00                  | 0.00                 | 0.00                 | 2.13                 | 0.00 |      |
|           |               |            | 959180G>T | D431Y     | 0.00                 | 0.00                | 0.00                  | 0.00                 | 0.00                 | 0.00                  | 0.00                 | 0.00                 | 2.13                 | 0.00 |      |
|           |               |            | 959398A>T | K503N     | 0.00                 | 0.00                | 0.00                  | 0.00                 | 0.00                 | 0.00                  | 0.00                 | 0.00                 | 0.00                 | 0.00 | 2.94 |
|           |               |            | 959401T>A | N504K     | 4.05                 | 0.00                | 4.05                  | 5.77                 | 1.22                 | 4.33                  | 2.78                 | 3.33                 | 4.41                 |      |      |
|           |               |            | 960702T>A | F938Y     | 0.00                 | 0.00                | 4.05                  | 5.77                 | 0.62                 | 1.55                  | 7.14                 | 3.00                 | 1.56                 |      |      |
|           |               |            | 961462G>A | M1191I    | 0.00                 | 0.00                | 0.35                  | 0.00                 | 0.00                 | 0.30                  | 0.00                 | 3.06                 | 0.00                 |      |      |
|           |               |            | 961473A>C | Q1195P    | 0.00                 | 0.00                | 0.18                  | 0.00                 | 0.00                 | 0.00                  | 2.78                 | 0.00                 | 0.00                 |      |      |
|           |               |            | 961494A>G | N1202S    | 0.00                 | 0.00                | 0.00                  | 0.00                 | 0.00                 | 0.30                  | 0.00                 | 2.00                 | 0.00                 |      |      |
| 961625G>T | D1246Y        | 2.03       | 0.00      | 1.94      | 1.92                 | 1.90                | 0.74                  | 5.71                 | 0.00                 | 0.00                  |                      |                      |                      |      |      |
| CRT       | PF3D7_0709000 | 7          | 403625A>C | K76T      | 61.11                | 100.00              | 52.82                 | 46.15                | 36.31                | 48.98                 | 31.94                | 54.17                | 48.48                |      |      |
|           |               |            | 404407G>T | A220S     | 57.26                | 100.00              | 53.01                 | 47.12                | 36.31                | 44.41                 | 30.56                | 46.67                | 33.33                |      |      |
|           |               |            | 404836C>G | Q271E     | 62.50                | 100.00              | 52.82                 | 48.08                | 36.31                | 49.71                 | 31.94                | 43.48                | 45.16                |      |      |
|           |               |            | 404948A>T | Y276F     | 0.00                 | 0.00                | 0.00                  | 0.00                 | 0.00                 | 0.00                  | 2.78                 | 0.00                 | 0.00                 |      |      |
|           |               |            | 405362A>G | N326S     | 0.74                 | 0.00                | 1.44                  | 0.00                 | 0.60                 | 1.03                  | 4.17                 | 1.04                 | 3.23                 |      |      |
|           |               |            | 405600T>C | I356T     | 22.54                | 100.00              | 29.75                 | 29.41                | 28.57                | 39.91                 | 15.28                | 36.73                | 33.33                |      |      |
|           |               |            | 405838G>T | R371I     | 61.27                | 100.00              | 53.35                 | 50.00                | 36.90                | 49.85                 | 30.56                | 45.56                | 48.28                |      |      |

|      |               |    |            |       |       |        |       |       |       |       |       |       |       |      |
|------|---------------|----|------------|-------|-------|--------|-------|-------|-------|-------|-------|-------|-------|------|
| K13  | PF3D7_1343700 | 13 | 1726226A>T | L258M | 1.35  | 0.00   | 1.06  | 0.00  | 0.00  | 0.44  | 0.00  | 2.00  | 0.00  |      |
|      |               |    | 1726234C>T | R255K | 4.05  | 16.67  | 2.29  | 0.00  | 3.61  | 2.51  | 0.00  | 0.00  | 0.00  | 1.43 |
|      |               |    | 1726349T>G | N217H | 0.00  | 0.00   | 0.00  | 0.00  | 0.00  | 0.00  | 0.00  | 2.78  | 0.00  | 0.00 |
|      |               |    | 1726431T>A | K189N | 6.76  | 0.00   | 4.40  | 2.88  | 3.05  | 3.54  | 11.43 | 7.84  | 6.76  |      |
|      |               |    | 1726432T>G | K189T | 52.70 | 83.33  | 49.82 | 62.50 | 44.23 | 54.91 | 44.29 | 50.00 | 56.76 |      |
|      |               |    | 1726663C>T | G112E | 0.00  | 0.00   | 1.76  | 0.00  | 5.95  | 1.32  | 0.00  | 0.00  | 0.00  |      |
|      |               |    | 1726697T>C | R101G | 0.00  | 0.00   | 0.18  | 0.00  | 0.60  | 0.44  | 2.78  | 0.00  | 0.00  |      |
|      |               |    | 1726737G>C | N87K  | 0.00  | 0.00   | 0.00  | 0.00  | 0.00  | 0.00  | 2.78  | 1.96  | 0.00  |      |
| DHFR | PF3D7_0417200 | 4  | 748145G>A  | V20I  | 0.00  | 0.00   | 0.00  | 0.00  | 0.00  | 0.00  | 0.00  | 2.04  | 0.00  |      |
|      |               |    | 748239A>T  | N51I  | 43.92 | 83.33  | 62.50 | 58.65 | 82.74 | 75.88 | 76.39 | 85.29 | 92.42 |      |
|      |               |    | 748262T>C  | C59R  | 45.27 | 83.33  | 67.08 | 66.35 | 83.93 | 78.59 | 81.94 | 89.22 | 93.94 |      |
|      |               |    | 748410G>A  | S108N | 45.27 | 83.33  | 66.90 | 66.35 | 83.33 | 80.99 | 81.94 | 92.71 | 92.65 |      |
|      |               |    | 748558T>G  | N157K | 0.00  | 0.00   | 0.00  | 0.00  | 0.00  | 0.00  | 2.78  | 0.00  | 0.00  |      |
|      |               |    | 748854A>G  | K256R | 0.00  | 0.00   | 0.00  | 2.88  | 0.00  | 0.00  | 0.00  | 0.00  | 0.00  |      |
| DHPS | PF3D7_0810800 | 8  | 548940G>C  | E189Q | 2.03  | 0.00   | 0.53  | 0.00  | 0.00  | 1.46  | 6.94  | 0.00  | 0.00  |      |
|      |               |    | 549666A>G  | I431V | 0.00  | 0.00   | 0.53  | 0.00  | 1.19  | 0.29  | 2.78  | 3.92  | 0.00  |      |
|      |               |    | 549681T>G  | S436A | 71.62 | 50.00  | 61.44 | 51.92 | 60.12 | 50.44 | 61.11 | 58.82 | 52.70 |      |
|      |               |    | 549685G>C  | A437G | 27.70 | 100.00 | 45.60 | 45.19 | 38.60 | 61.76 | 76.39 | 70.59 | 74.32 |      |
|      |               |    | 549993A>G  | K540E | 0.68  | 0.00   | 0.35  | 0.00  | 0.00  | 1.47  | 0.00  | 5.88  | 2.70  |      |
|      |               |    | 550117C>G  | A581G | 0.00  | 0.00   | 0.35  | 0.00  | 1.19  | 0.29  | 2.78  | 2.94  | 0.00  |      |
|      |               |    | 550212G>T  | A613S | 6.76  | 0.00   | 5.11  | 3.85  | 4.17  | 7.04  | 9.72  | 14.71 | 4.05  |      |

Nt = Nucleotide; AA = Amino Acid

**Supplemental Table ST2. Observed frequencies of *dhfr* and *dhps* haplotypes.** Frequencies of combinations of SNPs in *dhfr* and *dhps* known to confer SP resistance are reported. Malian isolates are grouped by collection year.

| Gene | Haplotype        | Frequency 2007 (%)<br>n=74 | Frequency 2013-2014 (%)<br>n=336 | Frequency 2015-2017 (%)<br>n=462 | Frequency 2019-2020 (%)<br>n=87 |
|------|------------------|----------------------------|----------------------------------|----------------------------------|---------------------------------|
| DHFR | CNCNI            | 43.84                      | 27.68                            | 13.97                            | 4.94                            |
|      | CIRNI            | 34.25                      | 55.06                            | 70.74                            | 82.72                           |
|      | CICNI            | 0.00                       | 0.00                             | 0.66                             | 1.23                            |
|      | CNRNI            | 1.37                       | 3.57                             | 2.84                             | 2.47                            |
|      | CNCNI            | 0.00                       | 0.00                             | 0.22                             | 0.00                            |
|      | Mixed Infections | 20.55                      | 13.69                            | 11.57                            | 8.64                            |
| DHPS | SAKAA            | 5.48                       | 23.81                            | 32.97                            | 25.93                           |
|      | AAKAA            | 8.22                       | 8.63                             | 12.88                            | 12.35                           |
|      | SGKAA            | 10.96                      | 6.55                             | 6.33                             | 0.00                            |
|      | SAEAA            | 0.00                       | 0.00                             | 0.87                             | 2.47                            |
|      | AGKAA            | 46.58                      | 39.29                            | 27.07                            | 16.05                           |
|      | AAKAS            | 1.37                       | 1.49                             | 4.59                             | 3.70                            |
|      | SGKAA            | 10.96                      | 6.55                             | 6.33                             | 0.00                            |
|      | SGKAS            | 0.00                       | 0.89                             | 0.44                             | 0.00                            |
|      | AGKAS            | 1.37                       | 0.30                             | 0.00                             | 0.00                            |
|      | SGKAS            | 0.00                       | 0.89                             | 0.44                             | 0.00                            |
|      | AAKGS            | 0.00                       | 0.30                             | 0.66                             | 1.23                            |
|      | Mixed Infections | 15.07                      | 11.31                            | 7.42                             | 38.27                           |
|      | DHFR+DHPS        | CIRNI+SAEAA                | 0.00                             | 0.00                             | 0.66                            |

**Supplemental Table ST3. Candidate regions in positive selection analysis using the integrated haplotype score (*iHS*) in Ouélessébougou (Mali 2019-2020) population.**

| Chr | Start   | End     | Number of markers | Mean <i>iHS</i> markers | Max <i>iHS</i> | Number of <i>iHS</i> extreme markers ( <i>iHS</i> $p < 1 \times 10^{-4}$ , two-sided) | Percentage of extreme <i>iHS</i> markers ( <i>iHS</i> $p < 1 \times 10^{-4}$ , two-sided) | Mean <i>iHS</i> of extreme markers ( <i>iHS</i> $p < 1 \times 10^{-4}$ , two-sided) | Genes in the region                                           | Products                                                                                                |
|-----|---------|---------|-------------------|-------------------------|----------------|---------------------------------------------------------------------------------------|-------------------------------------------------------------------------------------------|-------------------------------------------------------------------------------------|---------------------------------------------------------------|---------------------------------------------------------------------------------------------------------|
| 4   | 110000  | 140000  | 93                | 0.648                   | 7.899          | 3                                                                                     | 3.23                                                                                      | 5.571                                                                               | PF3D7_0402100                                                 | Plasmodium exported protein (PHISTb), unknown function                                                  |
| 7   | 590000  | 620000  | 166               | 0.638                   | 5.175          | 4                                                                                     | 2.41                                                                                      | 4.489                                                                               | PF3D7_0713600                                                 | ribosomal protein S5, mitochondrial, putative                                                           |
| 12  | 640000  | 670000  | 22                | 1.085                   | 5.628          | 2                                                                                     | 9.09                                                                                      | 5.075                                                                               | PF3D7_1216700(PLP2)                                           | perforin-like protein 2                                                                                 |
| 13  | 90000   | 120000  | 96                | 0.838                   | 6.023          | 2                                                                                     | 2.08                                                                                      | 5.597                                                                               | PF3D7_1302000(PTP6);<br>PF3D7_1301700(CBP2)                   | EMP1-trafficking protein;<br>CX3CL1-binding protein 2                                                   |
| 13  | 2490000 | 2520000 | 11                | 2.087                   | 10.641         | 2                                                                                     | 18.18                                                                                     | 10.316                                                                              | PF3D7_1362500(EXO);<br>PF3D7_1362700;<br>PF3D7_1362200(RUVB3) | 3'-5' exonuclease, putative;<br>conserved Plasmodium protein, unknown function;<br>RuvB-like helicase 3 |



**Supplemental Table ST4. Candidate regions in positive selection analysis using the between populations (*Rsb*) metric comparing the Ouélessébougou (Mali 2019-2020) population with the Mali 2007-2014 and Mali 2015-2017 populations.**

| Population comparison            | Chr | Start   | End     | Number of markers | Mean Rsb markers | Max Rsb | Number of Rsb extreme markers | Percentage of extreme Rsb markers | Mean Rsb of extreme markers | Genes in the region                           | Products                                               |
|----------------------------------|-----|---------|---------|-------------------|------------------|---------|-------------------------------|-----------------------------------|-----------------------------|-----------------------------------------------|--------------------------------------------------------|
| Mali 2007-2014 vs Mali 2019-2020 | 2   | 860000  | 890000  | 66                | 0.962            | 6.486   | 3                             | 4.55                              | 5.954                       | PF3D7_0221800                                 | hypothetical protein                                   |
| Mali 2007-2014 vs Mali 2019-2020 | 4   | 530000  | 560000  | 54                | 1.566            | 10.727  | 8                             | 14.81                             | 8.08                        | PF3D7_0412100(mtRPS12)                        | ribosomal protein S12, mitochondrial                   |
| Mali 2007-2014 vs Mali 2019-2020 | 4   | 590000  | 620000  | 210               | 0.747            | 14.738  | 10                            | 4.76                              | 8.515                       | PF3D7_0413600(RPT3)                           | 26S protease regulatory subunit 6B, putative           |
| Mali 2007-2014 vs Mali 2019-2020 | 4   | 1090000 | 1120000 | 178               | 0.534            | 14.937  | 2                             | 1.12                              | 11.893                      | PF3D7_0424300(EBA165)                         | erythrocyte binding antigen-165, pseudogene            |
| Mali 2007-2014 vs Mali 2019-2020 | 6   | 40000   | 80000   | 79                | 1.383            | 7.005   | 4                             | 5.06                              | 5.83                        | PF3D7_0601500                                 | Plasmodium exported protein (PHISTb), unknown function |
| Mali 2007-2014 vs Mali 2019-2020 | 7   | 590000  | 620000  | 294               | 0.846            | 12.113  | 2                             | 0.68                              | 8.736                       | PF3D7_0713600                                 | ribosomal protein S5, mitochondrial, putative          |
| Mali 2007-2014 vs Mali 2019-2020 | 10  | 1380000 | 1410000 | 238               | 0.859            | 12.178  | 6                             | 2.52                              | 8.413                       | PF3D7_1035400(MSP3);<br>PF3D7_1034900(MRScyt) | merozoite surface protein 3; methionine--tRNA ligase   |
| Mali 2007-2014 vs Mali 2019-2020 | 10  | 1580000 | 1610000 | 23                | 2.564            | 8.49    | 7                             | 30.43                             | 6.37                        | PF3D7_1040200                                 | stevor                                                 |
| Mali 2007-2014 vs Mali 2019-2020 | 13  | 90000   | 120000  | 122               | 1.243            | 6.454   | 4                             | 3.28                              | 5.869                       | PF3D7_1302000(PTP6);<br>PF3D7_1301700(CBP2)   | EMP1-trafficking protein;<br>CX3CL1-binding protein 2  |

|                                  |    |         |         |     |       |        |    |       |       |                                                                     |                                                                                                                                         |
|----------------------------------|----|---------|---------|-----|-------|--------|----|-------|-------|---------------------------------------------------------------------|-----------------------------------------------------------------------------------------------------------------------------------------|
| Mali 2015-2017 vs Mali 2019-2020 | 3  | 110000  | 140000  | 206 | 0.825 | 10.366 | 4  | 1.94  | 7.117 | PF3D7_0302300;<br>PF3D7_0302500(CLAG3.1);<br>PF3D7_0302200(CLAG3.2) | erythrocyte membrane protein 1 (PfEMP1), pseudogene; cytoadherence linked asexual protein 3.1; cytoadherence linked asexual protein 3.2 |
| Mali 2015-2017 vs Mali 2019-2020 | 4  | 530000  | 560000  | 56  | 1.019 | 7.812  | 2  | 3.57  | 7.812 | PF3D7_0412100(mtRPS12)                                              | ribosomal protein S12, mitochondrial                                                                                                    |
| Mali 2015-2017 vs Mali 2019-2020 | 4  | 590000  | 620000  | 205 | 0.911 | 16.604 | 11 | 5.37  | 8.429 | PF3D7_0413600(RPT3)                                                 | 26S protease regulatory subunit 6B, putative                                                                                            |
| Mali 2015-2017 vs Mali 2019-2020 | 6  | 50000   | 80000   | 59  | 1.573 | 6.537  | 3  | 5.08  | 5.614 | PF3D7_0601500                                                       | Plasmodium exported protein (PHISTb), unknown function                                                                                  |
| Mali 2015-2017 vs Mali 2019-2020 | 6  | 710000  | 740000  | 16  | 2.032 | 10.73  | 2  | 12.5  | 8.746 | PF3D7_0617200);<br>PF3D7_0617600);<br>PF3D7_0617100                 | BFR1 domain-containing protein, putative; stevor; AP-2 complex subunit alpha, putative                                                  |
| Mali 2015-2017 vs Mali 2019-2020 | 10 | 1380000 | 1410000 | 239 | 0.683 | 9.906  | 6  | 2.51  | 7.723 | PF3D7_1035400(MSP3);<br>PF3D7_1034900(MRScyt)                       | merozoite surface protein 3; methionine--tRNA ligase                                                                                    |
| Mali 2015-2017 vs Mali 2019-2020 | 10 | 1580000 | 1610000 | 24  | 2.476 | 8.486  | 7  | 29.17 | 6.454 | PF3D7_1040200                                                       | stevor                                                                                                                                  |
| Mali 2015-2017 vs Mali 2019-2020 | 13 | 90000   | 120000  | 119 | 2.335 | 12.761 | 19 | 15.97 | 6.226 | PF3D7_1302000(PTP6);<br>PF3D7_1301700(CBP2)                         | EMP1-trafficking protein; CX3CL1-binding protein 2                                                                                      |

**Supplemental Table ST5. Top 5% of Identity-by-descent (IBD) regions in 2019-2020 Mali isolates from Ouélessébougou.**

| Chr | Start   | End     | Fraction   | Location        | Gene ID       | Gene product                                                         | Gene name |
|-----|---------|---------|------------|-----------------|---------------|----------------------------------------------------------------------|-----------|
| 6   | 1110001 | 1120000 | 0.02074037 | 1114544-1117537 | PF3D7_0627800 | acetyl-CoA synthetase, putative                                      | ACS       |
| 6   | 1200001 | 1210000 | 0.02281915 | 1205190-1207781 | PF3D7_0629300 | phospholipase, putative                                              | PL        |
| 6   | 1210001 | 1220000 | 0.02544293 | 1210420-1212762 | PF3D7_0629400 | polyadenylate-binding protein 3, putative                            | PABP3     |
| 6   | 1210001 | 1220000 | 0.02544293 | 1213948-1216005 | PF3D7_0629500 | amino acid transporter AAT1                                          | AAT1      |
| 6   | 1220001 | 1230000 | 0.02996695 | 1221941-1242922 | PF3D7_0629700 | SET domain protein, putative                                         | SET1      |
| 6   | 1230001 | 1240000 | 0.03621427 | 1221941-1242922 | PF3D7_0629700 | SET domain protein, putative                                         | SET1      |
| 6   | 1240001 | 1250000 | 0.04015512 | 1221941-1242922 | PF3D7_0629700 | SET domain protein, putative                                         | SET1      |
| 6   | 1250001 | 1260000 | 0.04146341 | 1254907-1256940 | PF3D7_0630100 | alpha/beta hydrolase, putative                                       | /         |
| 7   | 370001  | 380000  | 0.0249511  | 372897-373106   | PF3D7_0708100 | DNA-directed RNA polymerases I, II, and III subunit RPABC5, putative | RPB10     |
| 7   | 380001  | 390000  | 0.03311512 | 385583-388321   | PF3D7_0708500 | heat shock protein 86 family protein                                 | /         |
| 7   | 390001  | 400000  | 0.04070598 | 395711-398332   | PF3D7_0708800 | heat shock protein 110                                               | HSP110c   |
| 7   | 390001  | 400000  | 0.04070598 | 391502-392188   | PF3D7_0708700 | Cg8 protein                                                          | /         |
| 7   | 400001  | 410000  | 0.0493389  | 403222-406317   | PF3D7_0709000 | chloroquine resistance transporter                                   | CRT       |
| 7   | 420001  | 430000  | 0.05203866 | 428723-429346   | PF3D7_0709500 | nucleic acid-binding protein, putative                               | /         |
| 7   | 430001  | 440000  | 0.04008451 | 435089-436195   | PF3D7_0709700 | prodrug activation and resistance esterase                           | PARE      |
| 7   | 460001  | 470000  | 0.01624402 | 463105-471837   | PF3D7_0710200 | conserved Plasmodium protein, unknown function                       | /         |
| 13  | 100001  | 110000  | 0.01553341 | 99548-100521    | PF3D7_1301700 | CX3CL1-binding protein 2                                             | CBP2      |

## **SUPPLEMENTAL FILES**

### **Supplemental File 1**

Samples included in the analysis (SupplementalFile1.xlsx)
