# Supplementary material
Source: PubMed Central journal article supplement (PMC10260956)
Supplement: 41598_2023_36002_MOESM3_ESM.pdf [file 41598_2023_36002_MOESM3_ESM.pdf]

1 **Variation génétique à l'échelle du génome et surveillance moléculaire de la résistance**  
2 **aux médicaments dans les isolats de *Plasmodium falciparum* provenant des personnes**  
3 **asymptomatiques à Ouélessébougou, au Mali.**

4

5 Leen N. Vanheer<sup>1</sup>, Almahamoudou Mahamar<sup>2</sup>, Emilia Manko<sup>1</sup>, Sidi M. Niambele<sup>2</sup>, Koualy  
6 Sanogo<sup>2</sup>, Ahamadou Youssouf<sup>2</sup>, Adama Dembele<sup>2</sup>, Makonon Diallo<sup>2</sup>, Seydina O. Maguiraga<sup>2</sup>,  
7 Jody Phelan<sup>1</sup>, Ashley Osborne<sup>1</sup>, Anton Spadar<sup>1</sup>, Merel J. Smit<sup>3</sup>, Teun Bousema<sup>3</sup>, Chris  
8 Drakeley<sup>1</sup>, Taane G. Clark<sup>1,4</sup>, William Stone<sup>1</sup>, Alassane Dicko<sup>2</sup>, Susana Campino<sup>1</sup>

9

10 <sup>1</sup> Faculty of Infectious and Tropical Diseases, London School of Hygiene & Tropical Medicine, London,  
11 UK

12 <sup>2</sup> Malaria Research and Training Centre, Faculty of Pharmacy and Faculty of Medicine and Dentistry,  
13 University of Sciences Techniques and Technologies of Bamako, Bamako, Mali

14 <sup>3</sup> Department of Medical Microbiology and Radboud Center for Infectious Diseases, Radboud  
15 University Medical Center, Nijmegen, Netherlands

16 <sup>4</sup> Faculty of Epidemiology and Population Health, London School of Hygiene & Tropical Medicine,  
17 London, UK

18

19

20

21 Auteurs correspondants

22 Dr. Leen Vanheer et Prof. Susana Campino

23 Department of Infection Biology

24 London School of Hygiene & Tropical Medicine,

25 London WC1E 7HT, UK

26 leen.vanheer@lshtm.ac.uk, susana.campino@lshtm.ac.uk

27

28

## 29 **Résumé**

30 L'analyse de la séquence des parasites *Plasmodium falciparum* est utile pour garantir le succès durable  
31 des programmes de lutte contre le paludisme. Les technologies de séquençage du génome entier donnent  
32 un aperçu de l'épidémiologie et de la variation à l'échelle du génome des populations de *P. falciparum*  
33 et peuvent caractériser les changements géographiques et temporels. Cela est particulièrement important  
34 pour surveiller l'émergence et la propagation de parasites de *P. falciparum* résistants aux médicaments,  
35 qui menacent les programmes de lutte contre le paludisme dans le monde entier. Nous présentons ici  
36 une caractérisation détaillée de la variation génétique à l'échelle du génome et des profils de résistance  
37 aux médicaments chez des personnes asymptomatiques dans le sud-ouest du Mali, où la transmission  
38 du paludisme est intense et saisonnière, et où le nombre de cas a récemment augmenté. Des échantillons  
39 collectés à Ouélessébougou, au Mali (2019-2020 ; n=87) ont été séquencés et placés dans le contexte  
40 d'isolats de *P. falciparum* maliens (2007-2017 ; n=876) et africains (n=711) plus anciens. Notre analyse  
41 a révélé une forte multiclonalité et une faible parenté entre les isolats, ainsi que des fréquences accrues  
42 de marqueurs moléculaires de résistance à la sulfadoxine-pyriméthamine et à la luméfántrine, par  
43 rapport aux isolats maliens plus anciens. En outre, 21 gènes soumis à une pression sélective ont été  
44 identifiés, dont un candidat vaccin bloquant la transmission (*pfCelTOS*) et un locus d'invasion  
45 érythrocytaire (*pfdblmsp2*). Dans l'ensemble, notre travail fournit l'évaluation la plus récente de la  
46 diversité génétique de *P. falciparum* au Mali, un pays où le paludisme occupe la deuxième place en  
47 Afrique de l'Ouest, ce qui permet d'éclairer les activités de lutte contre le paludisme.

48

49

50

51

52

## 53 INTRODUCTION

54 On estime que le paludisme sera à l'origine de 250 millions de maladies dans le monde et de 619 000  
55 décès associés rien qu'en 2021. Le Mali fait partie des 9 pays où la charge de morbidité du paludisme  
56 est la plus élevée et le nombre de cas de paludisme a augmenté entre 2016 et 2021 [1]. La plupart des  
57 cas de paludisme au Mali et dans le reste de l'Afrique subsaharienne sont causés par *Plasmodium*  
58 *falciparum*, le parasite le plus virulent du paludisme humain. Le Mali est divisé en cinq zones  
59 écoclimatiques [2] à travers lesquelles la transmission du paludisme fluctue. La zone du Sud-Ouest a  
60 les taux d'incidence de *P. falciparum* les plus élevés et la transmission est fortement saisonnière,  
61 coïncidant avec la saison des pluies annuelle. Cependant, dans les différentes régions du sud-ouest du  
62 Mali, le degré de transmission pérenne et saisonnière et varie, tout comme le moment de la saison des  
63 pluies, ce qui entraîne une hétérogénéité des saisons de transmission et de l'épidémiologie du paludisme  
64 [2].

65  
66 Conformément aux directives de l'OMS, les stratégies actuelles d'intervention contre le paludisme au  
67 Mali comprennent des combinaisons thérapeutiques à base d'artémisinine (CTA) pour le paludisme  
68 simple à *P. falciparum*, l'artéméther-luméfantrine (AL) étant le traitement de première intention. Les  
69 stratégies de chimioprévention du paludisme saisonnier (CPS), consistant en l'association de  
70 sulfadoxine-pyriméthamine et d'amodiaquine (SPAQ) chez les enfants et le traitement préventif  
71 intermittent des femmes enceintes (IPTp) avec la sulfadoxine-pyriméthamine (SP) seulement, ont été  
72 largement mises en œuvre dans les pays africains et ont été introduites au Mali à partir de 2012 et de  
73 2015, respectivement.

74  
75 Outre les perturbations dues à la pandémie de COVID-19, l'augmentation de l'incidence de la maladie  
76 a été liée à l'émergence et à la propagation de parasites *P. falciparum* résistants aux médicaments [1].  
77 Les souches résistantes à la SP, aux dérivés de l'artémisinine et aux médicaments partenaires constituent  
78 un défi majeur dans la lutte contre le paludisme [3]. Les marqueurs moléculaires de la résistance aux  
79 médicaments sont donc extrêmement utiles pour identifier et surveiller les parasites *P. falciparum*

80 résistants aux médicaments et ont été décrits pour la plupart des médicaments antipaludiques. Des  
81 mutations dans le gène de résistance aux médicaments multiples (*pfmdr1*), par exemple, ont été  
82 associées à diverses réponses des parasites à la luméfántrine, à la chloroquine (CQ), à l'amodiaquine, à  
83 la méfloquine et à la pipéraqúine. La base génétique de la résistance à la SP est bien documentée et  
84 implique une accumulation de mutations dans le gène de la dihydrofolate-réductase (*pf<sub>dhfr</sub>*) (N51I,  
85 C59R, S108N et I164L) et dans le gène de la dihydroptéroate-synthase (*pf<sub>dhps</sub>*) (S436A/F, A437G,  
86 K540E, A581G et A613S/T). Les infections hébergeant le triple mutant *dhfr* CIRNI (mutations  
87 soulignées) sont courantes dans toute l'Afrique et sont résistantes à la pyriméthamine [4], [5]. [4], [5].  
88 La combinaison de ce triple mutant *dhfr* avec le double mutant *dhps* (A437G et K540E, SGEAA)  
89 augmente encore le risque d'échec du traitement par SP à 50 % [5], [6].

90

91 Des mutations du gène *pfkelch13* associées à une sensibilité réduite à l'artémisinine sont apparues et se  
92 sont répandues en Asie du Sud-Est et sont apparues plus récemment dans plusieurs pays d'Afrique de  
93 l'Est [7]-[9]. On s'attend à ce que ce phénomène s'étende à d'autres régions d'Afrique et il est donc  
94 essentiel de surveiller en permanence les variations génétiques de *pfkelch13*. La forte prévalence de la  
95 résistance à la CQ a conduit à son retrait de toutes les directives de traitement des infections à *P.*  
96 *falciparum* en Afrique subsaharienne. Des décennies plus tard, des parasites *P. falciparum* sensibles à  
97 la CQ sont réapparus dans de nombreuses régions du monde [10]-[13]. C'est pourquoi il a été proposé  
98 de réintroduire la CQ, en association avec d'autres antipaludiques [14]. Les rapports du Mali n'ont pas  
99 observé de diminution substantielle de la fréquence des mutations du transporteur de la résistance à la  
100 chloroquine (*pf<sub>prt</sub>*) associées à la résistance à la CQ [15], bien qu'une tendance à la baisse ait été  
101 récemment signalée dans des isolats maliens collectés en 2016-2017 [16]. Il est donc important de  
102 poursuivre l'évaluation afin de déterminer si la CQ pourrait être réintroduite dans la région à l'avenir.

103

104 La majorité des infections paludéennes dans les zones endémiques sont asymptomatiques [17].  
105 Cependant, ces porteurs ont tendance à être sous-représentés dans les analyses génomiques à grande  
106 échelle, en raison à la fois de l'absence de recherche de traitement et des difficultés techniques liées au  
107 séquençage des infections à faible densité. Les porteurs asymptomatiques sont les principaux

108 contributeurs au réservoir infectieux, car ils peuvent rester infectieux pendant de longues périodes sans  
109 présenter de symptômes, ce qui signifie qu'ils peuvent transmettre la maladie à d'autres sans savoir qu'ils  
110 sont infectés. En outre, leur fréquence dans la population et les caractéristiques des individus qui sont  
111 plus susceptibles d'être asymptomatiques, comme un risque plus élevé de piqûres de moustiques,  
112 augmentent encore leur contribution au réservoir infectieux [18], [19]. Il est donc essentiel de  
113 comprendre les caractéristiques génétiques du réservoir asymptomatique pour contrôler efficacement la  
114 propagation du paludisme.

115

116 Les progrès des technologies de séquençage de nouvelle génération (NGS) ont rendu le séquençage du  
117 génome entier (WGS) plus accessible et plus abordable pour la gestion des maladies et la lutte contre  
118 le paludisme. Outre l'identification et le suivi des marqueurs moléculaires de la résistance aux  
119 médicaments, l'étude des variations génomiques est utile pour comprendre la dynamique de la  
120 transmission, les balayages sélectifs et l'épidémiologie de *P. falciparum*. L'évaluation des changements  
121 dans la parenté génomique au sein d'une population, y compris en utilisant des mesures d'identité par  
122 descendance, peut donner des indications sur la démographie de la population parasitaire et l'intensité  
123 de la transmission au fil du temps [20]. En outre, l'identification des gènes soumis à une sélection peut  
124 donner des indications sur la pression sélective exercée par les médicaments ou d'autres agents  
125 inconnus, ce qui est important pour élaborer des stratégies efficaces de prévention, de contrôle et de  
126 traitement du paludisme.

127

128 En résumé, la surveillance de la résistance aux médicaments de *P. falciparum* est essentielle pour  
129 informer les politiques pharmaceutiques dans le monde entier, en particulier dans les régions à forte  
130 transmission du paludisme, et l'OMS recommande une mise à jour et une surveillance régulière de la  
131 résistance aux médicaments antipaludiques pour soutenir les progrès accomplis dans la lutte contre le  
132 paludisme et son élimination. [21] . Dans ce rapport, nous fournissons une analyse approfondie des  
133 profils de résistance aux médicaments et des variations génomiques récentes, en utilisant la sélection,  
134 l'ascendance et l'analyse de l'identité par descendance, chez les personnes asymptomatiques à  
135 Ouélessébougou et dans les villages voisins, au Mali, en 2019 et 2020. En outre, nous les plaçons dans

136 le contexte des isolats maliens de *P. falciparum* collectés entre 2007 et 2017, ainsi que des populations  
137 parasitaires à l'échelle de l'Afrique.

138

## 139 **RÉSULTATS**

### 140 *Structure génomique des populations maliennes de P. falciparum*

141 L'analyse SNP à l'échelle du génome de 962 isolats maliens de *P. falciparum*, collectés entre 2007 et  
142 2020 dans deux études différentes et provenant de 9 endroits (**figure 1A**), a révélé des différences dans  
143 la multiplicité de l'infection et la structure de la population. Les isolats de Ouélessébougou collectés en  
144 2019-2020 provenaient d'infections asymptomatiques à *P. falciparum*, tandis qu'aucun détail sur la  
145 présentation clinique n'était disponible pour les génomes disponibles publiquement dans la base de  
146 données MalariaGEN. Les taux d'incidence de *P. falciparum* ont varié d'un site d'échantillonnage à  
147 l'autre et sur deux décennies (**figure 1A-B**). Au total, 863 046 SNP de haute qualité ont été identifiés.  
148 La multiclonalité a été mesurée à l'aide de la métrique  $F_{ws}$ , ou coefficient de consanguinité, qui indique  
149 une monoclonalité si elle est  $> 0,95$ , tandis qu'une métrique  $F_{ws}$  plus faible indique une multiclonalité.  
150 La valeur moyenne de  $F_{ws}$  pour les échantillons du Mali 2019-2020 ( $n=87$ ) provenant de  
151 Ouélessébougou était de 0,80, avec seulement 20% des échantillons abritant un seul clone. Nous avons  
152 constaté une multiclonalité élevée dans les isolats de Ouélessébougou 2019-2020 par rapport aux isolats  
153 provenant de différents sites où la collecte a eu lieu entre 2015 et 2017 (**figure 1C**). En utilisant les  
154 données SNP, une analyse statistique UMAP (Uniform Manifold Approximation and Projection) pour  
155 regrouper les isolats, a révélé peu de sous-structure spatiale entre les populations, bien qu'un certain  
156 regroupement basé sur le lieu (**Figure 1D**) et l'année de collecte (**Figure 1E**) puisse être observé et que  
157 les isolats de Ouélessébougou forment un sous-groupe individuel.

158

### 159 *Structure génomique des populations maliennes de P. falciparum par rapport aux* 160 *populations africaines*

161 Une visualisation UMAP basée sur les SNP et un arbre du maximum de vraisemblance montrent  
162 comment les isolats de Ouélessébougou les plus récemment collectés sont apparentés aux populations  
163 africaines ( $n=875$ ) et ont révélé une similarité avec les isolats d'Afrique de l'Ouest et d'Afrique centrale

164 (**figure 2A-B**). Aucun groupe distinct ne peut être détecté, ce qui indique une forte parenté et suggère  
165 des mouvements d'informations génétiques au sein de ces populations, qui peuvent se produire à la fois  
166 par le biais de la migration humaine et de la migration des vecteurs. Les isolats d'Afrique de l'Est,  
167 d'Afrique du Sud-Est et d'Afrique centrale forment des groupes distincts, tandis que la Corne de  
168 l'Afrique semble constituer un groupe distinct au sein de la population d'Afrique de l'Est. L'évaluation  
169 de la multiclonalité montre que les isolats maliens de 2019-2020 sont relativement plus multiclonaux  
170 que les isolats collectés dans d'autres pays d'Afrique de l'Ouest (**figure 2C**).

171

### 172 *Fréquences des marqueurs moléculaires de résistance aux médicaments*

173 Des fréquences accrues des marqueurs moléculaires de la sulfadoxine-pyriméthamine et la persistance  
174 des marqueurs de résistance à la chloroquine ont été observées dans la population de Ouélessébougou  
175 2019-2020 (n=87), par rapport aux isolats maliens de 2007-2017 (n=876) (**Tableau ST1**). Les  
176 polymorphismes provoquant des changements d'acides aminés qui confèrent une résistance à la  
177 chloroquine dans le *pfprt* (K76T, A220S, Q271E, N326S, I356T et R371I) ont persisté à des fréquences  
178 similaires au fil du temps (**Figure 3A-B**). Le polymorphisme N86Y sur *pfmdr1* a diminué au fil du  
179 temps, passant de 28,4 % en 2007 à 2,6 % en 2020. Cet allèle 86Y a été associé à la résistance à la  
180 chloroquine et à l'amodiaquine ainsi qu'à la résistance à la pipéraquine (allèle 86Y en combinaison avec  
181 Y184F), tandis que les parasites porteurs de l'allèle N86 sont moins sensibles à la luméfántrine, à la  
182 pipéraquine et à la méfloquine [22], [23]. Les modifications des acides aminés Y184F et D1246Y dans  
183 le MDR1 ont persisté à des fréquences comparables. Trois SNP non synonymes dans *pfmdr1* qui  
184 n'avaient pas été trouvés auparavant dans les isolats maliens, entraînant des changements d'acides  
185 aminés S400C, D431Y et K503N, ont été identifiés dans 2,13% des isolats de 2019 et 2,94% des isolats  
186 de 2020, respectivement (**tableau ST1**). La fréquence des mutations ponctuelles du *pfdhfr* associées à  
187 la résistance à la pyriméthamine (N51I, C59R et S108N) a approximativement doublé depuis 2007,  
188 atteignant des fréquences alarmantes de 92,4 %, 93,9 % et 92,7 %, respectivement, en 2020. En outre,  
189 l'haplotype **CIRNI** triple mutant a augmenté en fréquence et représentait 82,7 % de la population de  
190 parasites en 2019-2020, tandis que l'haplotype de type sauvage était réduit à 4,9 % (**figure 3C, tableau**  
191 **ST2**). Une mutation du *pfdhps* conférant une résistance à la sulfadoxine (A437G) a vu sa fréquence

192 augmenter de 27,7 % en 2007 à 74,3 % en 2020, tandis que S436A a montré une tendance à la baisse  
193 (**figure 3D**). La mutation *pfdhps* K540E a été trouvée dans 4 isolats en 2019-2020 et toutes ces  
194 mutations ont été combinées avec le triple mutant *dhfr* du **CIRNI**, conduisant à une fréquence de mutant  
195 quadruple de 2,47%. Un SNP non synonyme en position 748145 dans *pfdhfr* (V20I), a été nouvellement  
196 identifié dans les isolats maliens en 2019, à une fréquence de 2,04%. Aucune mutation connue de  
197 *pfkelch13* associée à la résistance à l'artémisinine n'a été identifiée dans les isolats maliens. Les  
198 mutations R255K, K189N et K189T de *pfkelch13* ont persisté à des fréquences similaires à celles  
199 observées en 2007 et aucune nouvelle mutation de *pfkelch13* n'a été identifiée (**tableau ST1**).

200

### 201 ***Régions soumises à une pression sélective dans les isolats maliens***

202 La détermination des régions génomiques soumises à une sélection directionnelle par l'analyse de la  
203 structure des haplotypes dans les isolats de Ouélessébougou 2019-2020 et en comparaison avec les  
204 populations maliennes plus anciennes, a révélé qu'un certain nombre de gènes étaient soumis à une  
205 pression sélective. Le score d'haplotype intégré (*iHS*) a été utilisé pour identifier les SNP sous sélection  
206 dans la population 2019-2020 (**Figure 4A**) et les régions du génome avec un nombre élevé de SNP sous  
207 sélection (**Tableau ST3**). Cela a permis d'identifier des gènes codant pour des protéines conservées de  
208 *Plasmodium* dont la fonction est inconnue (PF3D7\_0212100 et PF3D7\_0425100), principalement  
209 exprimés dans les ookinètes et les stades annulaires, respectivement, ainsi que le gène *pfCelTOS*, qui  
210 code pour une protéine de traversée des cellules pour les ookinètes et les sporozoïtes et qui a été suggéré  
211 comme un antigène candidat intéressant pour les vaccins [24], [25]. L'indice *Rsb* entre les populations  
212 a été utilisé pour identifier les SNP en cours de sélection lors de la comparaison de la population 2019-  
213 2020 avec les isolats maliens plus anciens collectés en 2007-2014 (n=414) (**Figure 4B**) et 2015-2017  
214 (n=462) (**Figure 4C**). Les régions présentant un nombre élevé de SNP sous sélection ont également été  
215 déterminées (**tableau ST4**). Cela a permis d'identifier des gènes associés à l'invasion des érythrocytes  
216 (*pfdblmsp2*, *pfmsp3*), au transport des protéines (*pfMC-2TM*), à la cytoadhérence (*pfCLAG3.2*), ainsi  
217 qu'un gène codant pour un ARN de fonction inconnue (Pf3D7\_0421400, RUF6).

218



219 *L'analyse des mélanges ancestraux confirme que les isolats maliens ont des ancêtres*  
220 *similaires*

221 L'estimation de l'ascendance spatiale des isolats maliens et des populations africaines a révélé des  
222 origines ancestrales similaires pour tous les isolats maliens de *P. falciparum*. Le nombre optimal de  
223 populations ancestrales a été estimé à 5 (K=5 ; K1-K5), sur la base de la décroissance des valeurs  
224 propres correspondant à K allant de 1 à 10. La population ancestrale K1 était dominante dans les  
225 échantillons gambiens (49,4 %), tandis que la population ancestrale K2 semblait être liée aux  
226 populations du Centre-Sud et de l'Afrique de l'Est (Malawi, 92,3 % ; Madagascar, 74,4 % ; Tanzanie,  
227 69 % ; Kenya, 61,9 %). Les isolats maliens, ainsi que les isolats mauritaniens, semblaient contenir  
228 principalement la population ancestrale K3 (Mali, 80,3 % ; Mauritanie, 80,5 %), ainsi que de plus petites  
229 portions d'ascendance K2 (Mali, 8,5 % ; Mauritanie, 7,7 %) et K4 (Mali, 10 % ; Mauritanie, 10,1 %).  
230 De très faibles fractions d'ascendance K1 et K5 étaient présentes dans les isolats maliens et  
231 mauritaniens, à l'exception des isolats de Bandiagara au Mali qui ne semblaient pas contenir  
232 d'ascendance K5 (**Figure 5**).

233

234 *L'analyse de l'identité par descendance révèle la grande diversité de la population de*  
235 *Ouélessébougou*

236 En tant que mesure de la parenté génétique au sein des populations, l'analyse de l'identité par  
237 descendance (IBD) a révélé que les isolats de Ouélessébougou présentent de très faibles fractions d'IBD  
238 par paire à travers le génome (médiane = 0, intervalle = 0 - 0,133), tandis que les isolats maliens  
239 collectés en 2007-2014 et 2015-2017 ont montré une parenté légèrement plus élevée (médiane = 0,021  
240 et médiane = 0,017, respectivement) (**Figure S2**). Les 5 % de positions IBD les plus élevées (classées  
241 dans des fenêtres de 10 kb du génome) dans les isolats de Ouélessébougou étaient réparties dans 17  
242 régions sur 3 chromosomes (chr. 6, 7 et 13) (**Figure S3, Tableau ST5**). Trois régions à forte IBD sur  
243 le chromosome 6 incluaient le gène codant pour l'histone méthyltransférase SET1 et le gène *pfert* sur le  
244 chromosome 7 a également été identifié comme englobant une forte IBD.

245

## 246 **DISCUSSION**

247 Les technologies NGS ont fourni une méthode de plus en plus réalisable pour explorer la variation  
248 génomique à l'échelle du génome et la dynamique des populations de parasites du paludisme. Ici, nous  
249 avons fourni une analyse détaillée de la diversité génomique des isolats de *P. falciparum* provenant de  
250 porteurs de gamétocytes asymptomatiques dans 11 villages de Ouélessébougou en 2019 et 2020 et les  
251 avons placés dans le contexte d'isolats maliens précédemment séquencés, ainsi que d'isolats à l'échelle  
252 africaine via une analyse SNP à l'échelle du génome. Nous avons constaté une forte multiclonalité et  
253 une faible parenté entre les isolats et identifié des gènes soumis à une pression sélective. Nous avons  
254 également observé des fréquences accrues de marqueurs moléculaires de résistance à la sulfadoxine-  
255 pyriméthamine et à la luméfantrine, par rapport aux isolats maliens plus anciens.

256

257 Les génomes des isolats maliens de *P. falciparum* collectés entre 2007 et 2017 ont été générés  
258 précédemment [16], [26]. Cependant, une stratégie d'échantillonnage plus actualisée et plus  
259 systématique est nécessaire pour soutenir les efforts de contrôle et d'élimination de l'infection. .  
260 Ouélessébougou est une communauté rurale de la région de Koulikoro, dans le sud-ouest du Mali, qui  
261 présente l'un des taux d'incidence de *P. falciparum* les plus élevés du pays [27]. Idéalement, dans de  
262 tels contextes, il devrait y avoir un suivi régulier des changements dans la variation génomique, afin de  
263 déterminer les schémas épidémiologiques et la dynamique de la population, en particulier parmi les  
264 porteurs asymptomatiques de gamétocytes, et d'évaluer l'impact des mesures de contrôle de l'infection.  
265 Par exemple, une surveillance continue des marqueurs moléculaires de la résistance aux médicaments  
266 est nécessaire pour informer les approches de la chimiothérapie du paludisme.

267

268 Les isolats maliens présentent un regroupement mineur en utilisant la visualisation UMAP, les isolats  
269 de Ouélessébougou formant un sous-groupe. Sur un arbre de maximum de vraisemblance, les isolats de  
270 Ouélessébougou et d'autres isolats maliens se regroupent avec les populations d'Afrique de l'Ouest,  
271 comme prévu. Malgré un rapport récent observant une diminution de la multiplicité de l'infection de  
272 2007 à 2017 au Mali [16], nos résultats montrent une multiclonalité plus élevée en 2019-2020 que dans

273 les isolats provenant de différents sites où la collecte a eu lieu entre 2015 et 2017. Le statut hautement  
274 multiclonal de la population parasitaire étudiée peut s'expliquer par de multiples facteurs, tels que les  
275 taux d'incidence élevés de *P. falciparum* dans cette région (Fig. 1B), le moment de la collecte des  
276 échantillons pendant la saison de transmission maximale (septembre-décembre) et la présentation  
277 clinique asymptomatique des individus. Comme les porteurs asymptomatiques de gamétocytes de *P.*  
278 *falciparum* sont moins susceptibles de chercher un traitement, ces infections peuvent se prolonger, ce  
279 qui augmente la probabilité de réinfection et de multiclonalité. Bien que la plupart des données de  
280 séquençage disponibles proviennent d'infections incidentes, il est important de caractériser  
281 génétiquement les porteurs asymptomatiques de *P. falciparum*, car ce sont eux qui contribuent le plus  
282 au réservoir infectieux et qui sont à l'origine des infections qui échappent au traitement [18].

283

284 Les stratégies de traitement du paludisme dans le monde ont été modifiées au fil du temps en raison de  
285 l'émergence de parasites résistants aux anciens médicaments de première intention, dans le but de  
286 préserver l'efficacité des médicaments antipaludiques et de réduire le fardeau mondial du paludisme.  
287 Nous avons constaté que les fréquences des marqueurs moléculaires conférant une résistance à la CQ  
288 ont persisté dans les isolats maliens 2019-2020 à des fréquences similaires à celles d'il y a dix ans,  
289 malgré son retrait de toutes les directives de traitement de *P. falciparum* depuis 2006 et un rapport  
290 faisant état d'une tendance à la baisse en 2017 au Mali [16]. Cette situation est différente de celle d'autres  
291 régions du monde où un retour de la sensibilité à la CQ a été observé [11]-[14], [28] et pourrait indiquer  
292 un faible coût d'adaptation associé au maintien des polymorphismes de résistance au *pfcr*t dans la  
293 population ou une utilisation continue de la CQ en vente libre. [29]-[31], soulignant ainsi la nécessité  
294 d'étudier et de réduire la disponibilité de ce médicament au Mali.

295

296 Nous avons observé une augmentation de la variante N86 *pfmdr1* de 71,6 % en 2007 à 97,4 % en 2020.  
297 Cet allèle N86 a été associé à une moindre sensibilité à la luméfántrine, à la pipéraqúine et à la  
298 méfloqúine [22], [23], tandis que l'allèle 86Y a précédemment montré une résistance à la chloroqúine  
299 et à l'amodiaqúine, ainsi qu'à la pipéraqúine. 86Y a précédemment montré une résistance à la  
300 chloroqúine et à l'amodiaqúine, ainsi qu'une résistance à la pipéraqúine (allèle 86Y en combinaison

301 avec Y184F). Par conséquent, il a été constaté que l'AL sélectionnait l'allèle N86, tandis que  
302 l'artésunate-amodiaquine et la dihydroartémisinine-pipéraquine sélectionnent l'allèle 86Y. [32]-[35] .  
303 Le génotypage N86Y pourrait donc être un marqueur utile pour guider la rotation des CTA dans une  
304 zone géographique donnée [36]. Ainsi, l'augmentation observée de l'allèle N86 peut refléter une  
305 proportion croissante d'isolats présentant une sensibilité réduite à l'AL, ce qui soulève des inquiétudes  
306 quant à l'utilisation continue de l'AL en tant que CTA de première ligne au Mali. Une faible fréquence  
307 de l'allèle 86Y a déjà été rapportée au Mali en 2016, ainsi que dans d'autres pays africains où l'AL est  
308 largement utilisée [15], [34]. Ce résultat contraste avec l'augmentation de la fréquence de l'allèle 86Y  
309 observée précédemment chez les enfants de Ouélessébougou entre 2014 et 2016, après 3 ans de CPS  
310 avec SPAQ, qui était probablement due à la sélection de l'allèle 86Y par l'amodiaquine [37]. Cependant,  
311 il est important de noter que, bien qu'une diminution de la sensibilité à l'AL des isolats porteurs de  
312 l'allèle N86 ait été observée dans des isolats provenant de plusieurs pays africains [22], [32], [33] .

313

314 Des fréquences élevées de mutants **CIRNI** triple *pf<sub>dhfr</sub>* (82,72 %) ont été observées dans les isolats de  
315 Ouélessébougou de 2019-2020, ce qui représente une augmentation substantielle par rapport aux années  
316 précédentes (34,3 %, 55,1 % et 70,7 % en 2007, 2013-2014 et 2015-2017, respectivement). Le mutant  
317 *pf<sub>dhps</sub>* K540E, qui était quasi absent dans les isolats maliens collectés entre 2007 et 2017, a été retrouvé  
318 dans 5,9% des isolats de 2019 et 2,7% des isolats de 2020. En outre, tous les isolats mutants K540E  
319 portaient le triple mutant *dhfr*. Une surveillance continue est donc nécessaire pour contrôler les niveaux  
320 de résistance à la SP et l'émergence de mutants quadruple et quintuple (en combinaison avec *dhps*  
321 A437G ou *dhps* A581G). En outre, les cartes de prévalence des mutations en ligne telles que [wwarn.org](http://www.who.int/wwarn)  
322 SP molecular surveyor deviendront de plus en plus utiles pour évaluer le médicament à utiliser pour la  
323 CPS [38]. Aucun SNP à des positions du gène *pfkelch13* qui ont été signalées comme entraînant une  
324 diminution de la sensibilité aux dérivés de l'artémisinine n'a été observé dans les isolats maliens.  
325 Cependant, il est nécessaire de poursuivre la surveillance des mutants *pfkelch13* au cours des prochaines  
326 années, car on peut s'attendre à une propagation de ces allèles à partir de l'Afrique de l'Est ou à leur  
327 émergence indépendante.

328

329 L'analyse de la structure des haplotypes dans les isolats de Ouélessébougou de 2019-2020 a identifié  
330 des SNP soumis à une pression sélective dans le gène *pfCelTOS*, qui est impliqué dans la motilité de  
331 glissement des sporozoïtes, la traversée des cellules, et qui est un candidat vaccinal bloquant la  
332 transmission [24], [25]. Une pression sélective a été observée à cet emplacement génomique avant le  
333 début de l'épidémie de la grippe aviaire. La pression sélective a déjà été observée à cet emplacement  
334 génomique [39], ce qui indique un degré élevé de diversité et fait de *pfCelTOS* un candidat-vaccin moins  
335 intéressant. Une analyse croisée des populations comparant les populations de parasites de 2019-2020  
336 à celles de 2007-2014 et 2015-2017 a été réalisée et, malgré l'augmentation des fréquences des  
337 marqueurs moléculaires de la résistance aux médicaments au cours de cette période de 13 ans, nous  
338 n'avons trouvé aucun SNP associé à la résistance aux médicaments soumis à une pression sélective  
339 directionnelle. Nous avons identifié des SNP soumis à une pression sélective dans des gènes associés à  
340 l'invasion des érythrocytes (*pfdblmsp2*) dans les deux comparaisons de populations et des gènes associés  
341 au transport des protéines (*pfMC-2TM*), à la cytoadhérence (*pfCLAG3.2*) et à un gène codant pour un  
342 ARN de fonction inconnue (Pf3D7\_0421400, RUF6) dans la comparaison entre les populations de  
343 2019-2020 et de 2015-2017. La pression sélective dans *pfdblmsp2* et les membres de la famille  
344 multigénique *clag* a déjà été décrite et est probablement due à leur emplacement en tant que protéines  
345 de surface et au contact avec le système immunitaire de l'hôte qui en résulte [39], [40]. L'analyse IBD  
346 a révélé de très faibles fractions d'IBD par paire à travers le génome dans les isolats de Ouélessébougou  
347 2019-2020, ce qui indique une faible parenté entre les isolats. Le gène *pfCRT*, associé à la résistance à la  
348 CQ et à la pipéraquline, se trouvait dans les 5 % de positions IBD les plus élevées, ce qui suggère que  
349 ce gène est très conservé parmi les isolats de Ouélessébougou. Ceci est en accord avec les fréquences  
350 persistantes observées des marqueurs moléculaires de la résistance à la CQ. En outre, le gène *pfSET1*,  
351 une histone lysine méthyltransférase d'importation, était également très conservé. L'analyse de  
352 l'ascendance du mélange a montré des ascendances similaires pour tous les isolats maliens, ce qui est  
353 en accord avec un rapport récent [16].  
354  
355 Cette étude présente plusieurs limites. Tout d'abord, un biais d'échantillonnage ne peut être exclu car  
356 nous n'avons séquencé que des parasites provenant d'infections asymptomatiques et d'individus âgés de

357 5 à 50 ans, alors que les ensembles de données accessibles au public ne précisent pas la présentation  
358 clinique ou l'âge de l'individu. En outre, l'analyse du nombre de copies de la *plasmepsine 1-2*, qui  
359 confère la résistance à la pipéraquline, n'a pas été réalisée, en raison de l'amplification sélective du  
360 génome entier (sWGA) de l'ADN du parasite avant le séquençage, qui empêche une analyse adéquate  
361 du nombre de copies. Enfin, nous n'avons pas évalué la résistance phénotypique ou toute association  
362 entre le génotype et le phénotype, mais les marqueurs moléculaires de la résistance aux médicaments  
363 rapportés ici ont été largement prouvés pour prédire les niveaux de résistance aux médicaments *in vitro*  
364 ou les résultats du traitement des patients [4]-[6], [41]-[43].

365

366 Après des années de progrès dans la réduction de la charge mondiale du paludisme, les taux d'incidence  
367 et les décès sont maintenant en hausse. Cette augmentation pourrait être due aux perturbations des  
368 programmes de lutte contre le paludisme pendant la pandémie de COVID-19, mais la résistance aux  
369 antipaludiques a également été liée à cette augmentation. Pour progresser vers l'objectif de réduire de  
370 90 % le fardeau du paludisme dans le monde d'ici à 2030 [44], il est nécessaire de mettre en place des  
371 programmes de lutte contre le paludisme. Nous devons obtenir une image complète de la variation  
372 génomique et de l'épidémiologie des populations de parasites. Ici, nous avons fourni une évaluation  
373 actualisée de la diversité génomique de la population de parasites *P. falciparum* dans le sud-ouest du  
374 Mali, une région où la transmission du paludisme est très intense. Nos résultats montrent que les  
375 parasites originaires du Mali sont regroupés en fonction de leur origine géographique et temporelle, les  
376 isolats de Ouélessébougou formant un sous-groupe distinct. Ceci suggère une grande diversité  
377 génétique parmi les isolats maliens. Les marqueurs moléculaires de la résistance à la SP sont en  
378 augmentation, ce qui montre une progression vers l'échec de cette association médicamenteuse et  
379 nécessite une surveillance continue. Aucune diminution de la résistance à la CQ n'a été observée au fil  
380 du temps, ce qui s'oppose à l'idée d'une réintroduction potentielle de la CQ au Mali dans un avenir  
381 proche. Notre étude fournit des données précieuses sur le scénario épidémiologique actuel et la  
382 résistance aux médicaments du paludisme au Mali et peut contribuer à un contrôle efficace du paludisme  
383 au Mali. D'autres applications des approches de séquençage, y compris les nouvelles technologies

384 portables et les tests de séquençage d'amplicons, dans les pays où le paludisme est endémique sont  
385 nécessaires pour aider au contrôle de la maladie et informer les directives de traitement.

386

## 387 **MÉTHODES**

### 388 **Sites d'étude**

389 En 2019 et 2020, un total de 180 personnes présentant des gamétocytes de *P. falciparum* détectables au  
390 microscope en l'absence de symptômes de paludisme ont été recrutées dans le cadre de deux essais  
391 cliniques [45], [46] à Ouélessébougou et dans 11 villages de Ouélessébougou, au Mali (**Figure S1**).  
392 Ouélessébougou est une commune qui comprend la ville de Ouélessébougou et 44 villages  
393 environnants, soit un total d'environ 50 000 habitants. La ville est située à environ 80 km au sud de  
394 Bamako, la capitale du Mali. La transmission du paludisme à Ouélessébougou est très saisonnière et se  
395 produit pendant la saison des pluies, de juillet à novembre. Les données WGS publiquement disponibles  
396 sur les isolats maliens proviennent de huit autres sites du sud du Mali, essentiellement des villages  
397 ruraux (Bougoula-Hameau, Dangassa, Faladje, Kenieroba, Kolle, Nioro-du-Sahel, Bandiagara) et d'une  
398 zone urbaine (Bamako). Tous les sites ont un climat subtropical avec des saisons sèches et pluvieuses,  
399 à l'exception de Nioro-du-Sahel, qui est caractérisé par un climat désertique [2], [16].

400

### 401 **Collecte d'échantillons et séquençage du génome entier**

402 Au total, 97 échantillons de sang total ont été prélevés sur des porteurs de gamétocytes de *P. falciparum*,  
403 âgés de 5 à 50 ans, recrutés dans le cadre de deux essais cliniques précédemment publiés à  
404 Ouélessébougou [45], [46]. L'autorisation de mener cette étude a été obtenue auprès du Comité d'éthique  
405 de la recherche de la London School of Hygiene and Tropical Medicine (numéros de référence 17507  
406 et 21905) et du Comité d'éthique de l'Université des Sciences Techniques et Technologies de Bamako  
407 (numéros de référence 2019/67/CE/FMPOS et 2020/96/CE/FMPOS/FAPH) et a été réalisée  
408 conformément aux directives et réglementations en vigueur. Les essais ont été enregistrés sur  
409 ClinicalTrials.gov (NCT04049916 et NCT04609098). Le consentement éclairé écrit de tous les sujets  
410 et/ou de leurs tuteurs légaux a été obtenu avant le prélèvement des échantillons. Pour les participants

411 mineurs, le consentement éclairé pour la participation à l'étude a été obtenu de leurs parents et/ou de  
412 leur tuteur légal. L'identification des espèces a été effectuée au microscope par des microscopistes  
413 formés au Centre de recherche et de formation sur le paludisme de l'Université de Bamako (Bamako,  
414 Mali). L'ADN a été extrait de 83,3 µL de sang total à l'aide d'un extracteur automatisé MagNAPure LC  
415 (Total Nucleic Acid Isolation Kit High Performance ; Roche Applied Science, Indianapolis, IN, USA)  
416 et amplifié à l'aide d'un ensemble d'amorces et d'un protocole d'amplification sélective du génome entier  
417 (sWGA) établis. [47], [48]. Le séquençage du génome entier a été réalisé sur une plateforme Illumina  
418 Novaseq 6000 chez Eurofins Genomics, en Allemagne, ce qui a permis d'obtenir un minimum de 3,75  
419 millions de lectures appariées (lectures de 250 pb) par échantillon.

420

#### 421 **Sélection des ensembles de données, cartographie des lectures, détection des variantes et contrôle** 422 **de la qualité**

423 Au total, 1701 isolats de *P. falciparum* ont été inclus dans l'analyse (**fichier supplémentaire S1**), y  
424 compris des séquences de génomes entiers accessibles au public Malaria Genetic Epidemiology  
425 Network [26] (MalariaGEN) (Pf Community Project, n = 1141 ; SPOTmalaria project, n = 463) et des  
426 isolats nouvellement séquencés (n = 97) provenant de personnes asymptomatiques infectées par *P.*  
427 *falciparum* et recrutées dans le cadre de deux essais cliniques précédemment publiés à Ouélessébougou,  
428 au Mali [45], [46]. Toutes les données brutes ont été filtrées à l'aide de *trimmomatic* (version 0.39) et  
429 des paramètres suivants : LEADING:3 TRAILING:3 SLIDINGWINDOW:4:20 MINLEN:36. Les  
430 lectures Illumina ont ensuite été mises en correspondance avec le génome de référence de *P. falciparum*  
431 (Pf3D7 ; v3) à l'aide du logiciel *bwa-mem* (v0.7.17). Les SNP et les insertions et délétions courtes ont  
432 été appelés à l'aide des logiciels *samtools* (v1.12) et GATK (v4.1.4.1). Les SNP à appel mixte ont été  
433 assignés à des génotypes déterminés par un ratio de couverture dans lequel les appels de nucléotides  
434 étaient de 80 % ou plus. Les échantillons présentant plus de 40 % de lacunes n'ont été inclus dans aucune  
435 analyse. Sur les 97 échantillons nouvellement séquencés, 9 ont été retirés en raison de l'absence de  
436 réponse et un a été retiré après que la prédiction de l'espèce a identifié *P. malariae*  
437 (<https://github.com/jodyphelan/malaria-profiler>), laissant un total de 87 (89,6 %) isolats nouvellement  
438 séquencés dans les analyses finales. Parmi les ensembles de données accessibles au public, 8 ont été



439 supprimés, ce qui a donné un total de 1673 échantillons inclus dans les analyses, y compris des isolats  
440 du Cameroun (n = 99), de la République démocratique du Congo (RDC ; n = 98), de la Gambie (n =  
441 80), du Kenya (n = 91), du Malawi (n = 97), du Mali (n = 962), de la Mauritanie (n = 79), de la Tanzanie  
442 (n = 120), de Madagascar (n = 22) et de l'Éthiopie (n = 25).

443

#### 444 **Analyses génétiques des populations**

445 La visualisation de la géographie des sites d'échantillonnage a été réalisée à l'aide des logiciels R *ggmap*  
446 (version 3.0.0) et *tmap* (version 3.3.3). Les taux d'incidence de *P. falciparum* pour la période 2000-  
447 2020 ont été consultés sur le site du Malaria Atlas Project [27] . Les graphiques UMAP (Uniform  
448 Manifold Approximation and Projection) ont été créés à l'aide du package R *uwot* avec la métrique  
449 "hamming" et les paramètres par défaut. Un arbre de vraisemblance maximale a été créé en appliquant  
450 le logiciel *iqtree* en utilisant les SNP du génome entier, et la visualisation a été effectuée dans *iTOL*  
451 (version 6) [49], [50]. Pour les analyses génétiques des populations qui comparent les isolats maliens  
452 aux populations africaines, un sous-ensemble d'isolats maliens collectés entre 2007 et 2017 a été utilisé  
453 (y compris 10 isolats de chaque site et de chaque année de collecte, si disponible), afin d'obtenir un  
454 nombre comparable d'isolats entre les populations. La multiclonalité a été déterminée en calculant la  
455 métrique  $F_{ws}$ , à l'aide d'un script interne qui utilise le package R *moimix*  
456 (<https://github.com/bahlolab/moimix>) pour évaluer la diversité intra-hôte par rapport à la diversité de la  
457 population locale. Seuls les SNP bi-alléliques dans les régions codantes ont été utilisés pour les calculs  
458 et un filtrage des fréquences des allèles mineurs (MAF) de 0,1 % a été effectué afin d'inclure  
459 exclusivement les SNP robustes. Les MAF dans les gènes de résistance aux médicaments ont été extraits  
460 de la matrice binaire et annotés à l'aide du logiciel *CSQ de Bcftools*, qui identifie la mutation comme  
461 non synonyme, synonyme ou intergénique, ainsi que le décalage de codon et de protéine causé par toute  
462 mutation non synonyme [51]. Seules les positions génomiques avec des MAF d'au moins 2 % ont été  
463 retenues dans l'analyse. La visualisation des données a été réalisée à l'aide du progiciel R *ggplot2* (R  
464 version 4.1.2). Les régions du génome soumises à une sélection directionnelle ont été identifiées à  
465 l'aide du progiciel R *rehh* (version 3.2.2), qui utilise des mesures basées sur la population de la diversité  
466 des haplotypes au sein des populations (*iHS*) ou entre les populations (*Rsb*) [52]. Le progiciel R *Tess3r*

467 (version 1.1.0, utilisant les paramètres par défaut à l'exception de "rep=25") a été utilisé pour calculer  
468 le mélange sur la base de la modélisation spatiale du partage des allèles en utilisant les coordonnées  
469 géographiques des sites d'échantillonnage en plus des données SNP pangénomiques [53]. Le nombre  
470 optimal d'ascendances a été déterminé pour différents nombres de sous-populations ( $K = 1, 2, \dots, 10$ ).  
471 L'analyse IBD pour les isolats avec  $F_{ws} > 0,85$  a été réalisée pour évaluer la connectivité entre les  
472 parasites au sein des populations. Pour ce faire, on a estimé la fraction d'ascendance partagée par paire  
473 entre les segments génomiques, dont on a déduit qu'ils descendaient d'un ancêtre commun récent. Ces  
474 fractions IBD ont été calculées à l'aide du logiciel *hmmIBD* avec les paramètres par défaut, qui déploie  
475 une approche basée sur un modèle de Markov caché [54].

476

#### 477 **Remerciements**

478 Nous souhaitons remercier les participants à l'étude et le personnel du centre de santé communautaire  
479 de Ouélessébougou et des villages environnants pour leur coopération, ainsi que le moniteur de sécurité  
480 local et les membres du comité de surveillance des données et de la sécurité pour leur supervision. Nous  
481 remercions le centre de ressources MalariaGEN pour la génération des données génétiques publiées.

482

#### 483 **Déclaration de financement**

484 Cette analyse a été réalisée sur des génomes séquencés à partir d'échantillons de sang collectés dans le  
485 cadre de deux essais cliniques au Mali, financés par la Fondation Bill & Melinda Gates (#INV-002098).  
486 LNV bénéficie d'une bourse de doctorat du Biotechnology and Biological Sciences Research Council  
487 (BBSRC) LSHTM-tethered PhD award. SC est financé par le Medical Research Council UK  
488 (subvention n° MR/M01360X/1). TGC bénéficie du soutien du Medical Research Council UK  
489 (subventions n° MR/M01360X/1, MR/N010469/1, MR/R020973/1, MR/X005895/1). Les financeurs  
490 n'ont joué aucun rôle dans la conception de l'étude, la collecte et l'analyse des données, la décision de  
491 publier ou la préparation du manuscrit.

492

#### 493 **Contributions des auteurs**

494 A Dicko, WS, CD, MJS, TB et SC ont conçu et élaboré l'étude ; AM, SMN, KS, AY, A Dembele, MD,  
495 SO et A Dicko ont coordonné et effectué le recrutement et la collecte des échantillons ; LNV a traité  
496 les échantillons pour le séquençage. LNV, SC et CD ont coordonné le séquençage des échantillons ;  
497 LNV, EM, JP, AO et AS ont effectué l'analyse bioinformatique et statistique, sous la supervision de SC  
498 et TGC ; LNV a rédigé la première version du manuscrit, et la version finale a été révisée par tous les  
499 auteurs. Le manuscrit final a été lu et approuvé par tous les auteurs.

500

#### 501 **Intérêts concurrents**

502 Les auteurs ne déclarent aucun intérêt concurrent.

503

#### 504 **Disponibilité des données**

505 Les ensembles de données présentés dans cette étude se trouvent dans les Archives européennes de  
506 nucléotides (ENA). Les noms et les numéros d'accès des échantillons figurent dans le fichier  
507 supplémentaire S1. Les séquences brutes des isolats séquencés dans cette étude sont disponibles sur le  
508 site web de l'ENA (Project accession PRJEB60381).

509

## 510 RÉFÉRENCES

- 511 [1] Organisation mondiale de la santé, *Rapport sur le paludisme dans le monde 2022*.  
 512 Genève : Organisation mondiale de la santé, 2022. Consulté : 18 déc. 2022. [En ligne].  
 513 Disponible : [https://www.who.int/teams/global-malaria-programme/reports/world-](https://www.who.int/teams/global-malaria-programme/reports/world-malaria-report-2022)  
 514 [malaria-report-2022](https://www.who.int/teams/global-malaria-programme/reports/world-malaria-report-2022)
- 515 [2] M. Cissoko *et al*, 'Geo-Epidemiology of Malaria at the Health Area Level, Dire Health  
 516 District, Mali, 2013-2017', *Int. J. Environ. Res. Public. Health*, vol. 17, no. 11, p. 3982,  
 517 Jun. 2020, doi : 10.3390/ijerph17113982.
- 518 [3] M. Dhorda, C. Amaratunga, et A. M. Dondorp, 'Artemisinin and multidrug-resistant  
 519 Plasmodium falciparum - a threat for malaria control and elimination', *Curr. Opin.*  
 520 *Infect. Dis.*, vol. 34, no. 5, p. 432, Oct. 2021, doi : 10.1097/QCO.0000000000000766.
- 521 [4] W. Sirawaraporn, T. Sathitkul, R. Sirawaraporn, Y. Yuthavong et D. V. Santi,  
 522 "Antifolate-resistant mutants of Plasmodium falciparum dihydrofolate reductase", *Proc.*  
 523 *Natl. Acad. Sci. U. S. A.*, vol. 94, no. 4, pp. 1124-1129, Feb. 1997, doi :  
 524 10.1073/pnas.94.4.1124.
- 525 [5] S. G. Staedke, H. Sendagire, S. Lamola, M. R. Kanya, G. Dorsey et P. J.  
 526 Rosenthal, 'Relationship between age, molecular markers, and response to  
 527 sulphadoxine-pyrimethamine treatment in Kampala, Uganda', *Trop. Med. Int. Health*,  
 528 vol. 9, no. 5, pp. 624-629, 2004, doi : 10.1111/j.1365-3156.2004.01239.x.
- 529 [6] J. G. Kublin *et al*, 'Molecular Markers for Failure of Sulfadoxine-Pyrimethamine and  
 530 Chlorproguanil-Dapsone Treatment of Plasmodium falciparum Malaria', *J. Infect. Dis.*,  
 531 vol. 185, no. 3, pp. 380-388, Feb. 2002, doi : 10.1086/338566.
- 532 [7] A. Uwimana *et al*, 'Emergence and clonal expansion of in vitro artemisinin-resistant  
 533 Plasmodium falciparum kelch13 R561H mutant parasites in Rwanda', *Nat. Med.*, vol.  
 534 26, no. 10, pp. 1602-1608, Oct. 2020, doi : 10.1038/s41591-020-1005-2.
- 535 [8] B. Balikagala *et al*, 'Evidence of Artemisinin-Resistant Malaria in Africa', *N. Engl. J.*  
 536 *Med.*, vol. 385, no. 13, pp. 1163-1171, Sep. 2021, doi : 10.1056/NEJMoa2101746.
- 537 [9] B. H. Stokes *et al*, 'Plasmodium falciparum K13 mutations in Africa and Asia impact  
 538 artemisinin resistance and parasite fitness', *eLife*, vol. 10, p. e66277, Jul. 2021, doi :  
 539 10.7554/eLife.66277.
- 540 [10] A. E. P. Frosch *et al*, 'Return of Widespread Chloroquine-Sensitive Plasmodium  
 541 falciparum to Malawi', *J. Infect. Dis.*, vol. 210, no. 7, pp. 1110-1114, oct. 2014, doi :  
 542 10.1093/infdis/jiu216.
- 543 [11] K. K. Asare, J. Africa, J. Mbata, and Y. K. Opoku, 'The emergence of chloroquine-  
 544 sensitive Plasmodium falciparum is influenced by selected communities in some parts  
 545 of the Central Region of Ghana', *Malar. J.*, vol. 20, no. 1, p. 447, Nov. 2021, doi :  
 546 10.1186/s12936-021-03985-8.
- 547 [12] O. Dagnogo *et al*, " Vers une réémergence de la sensibilité à la chloroquine en Côte  
 548 d'Ivoire ? ", *Malar. J.*, vol. 17, no. 1, p. 413, nov. 2018, doi : 10.1186/s12936-018-2551-  
 549 7.
- 550 [13] B. J. Njiro, R. F. Mutagonda, A. T. Chamani, T. Mwakyandile, D. Sabas, and G. M.  
 551 Bwire, 'Molecular surveillance of chloroquine-resistant Plasmodium falciparum in sub-  
 552 Saharan African countries after withdrawal of chloroquine for treatment of  
 553 uncomplicated malaria : A systematic review', *J. Infect. Public Health*, vol. 15, no. 5,  
 554 pp. 550-557, mai 2022, doi : 10.1016/j.jiph.2022.03.015.
- 555 [14] J. G. Kublin *et al*, 'Reemergence of chloroquine-sensitive Plasmodium falciparum  
 556 malaria after cessation of chloroquine use in Malawi', *J. Infect. Dis.*, vol. 187, no. 12,  
 557 pp. 1870-1875, Jun. 2003, doi : 10.1086/375419.

- 558 [15] S. A. S. Diakité *et al*, 'A comprehensive analysis of drug resistance molecular markers  
559 and *Plasmodium falciparum* genetic diversity in two malaria endemic sites in Mali',  
560 *Malar. J.*, vol. 18, no. 1, p. 361, nov. 2019, doi : 10.1186/s12936-019-2986-5.
- 561 [16] A. Coulibaly *et al*, 'Genome-wide SNP analysis of *Plasmodium falciparum* shows  
562 differentiation at drug-resistance-associated loci among malaria transmission settings in  
563 southern Mali', *Front. Genet*, vol. 13, p. 943445, Oct. 2022, doi :  
564 10.3389/fgene.2022.943445.
- 565 [17] T. Bousema, L. Okell, I. Felger, and C. Drakeley, 'Asymptomatic malaria infections :  
566 detectability, transmissibility and public health relevance', *Nat. Rev. Microbiol*, vol. 12,  
567 no. 12, pp. 833-840, déc. 2014, doi : 10.1038/nrmicro3364.
- 568 [18] F. G. Tadesse *et al*, "The Relative Contribution of Symptomatic and Asymptomatic  
569 *Plasmodium vivax* and *Plasmodium falciparum* Infections to the Infectious Reservoir in  
570 a Low-Endemic Setting in Ethiopia" (La contribution relative des infections  
571 symptomatiques et asymptomatiques à *Plasmodium vivax* et *Plasmodium falciparum* au  
572 réservoir infectieux dans un contexte de faible endémicité en Éthiopie), *Clin. Infect. Dis.*  
573 *Off. Publ. Infect. Dis. Soc. Am.*, vol. 66, no. 12, pp. 1883-1891, Jun. 2018, doi :  
574 10.1093/cid/cix1123.
- 575 [19] B. P. Gonçalves *et al*, 'Examining the human infectious reservoir for *Plasmodium*  
576 *falciparum* malaria in areas of differing transmission intensity', *Nat. Commun*, vol. 8, no.  
577 1, p. 1133, déc. 2017, doi : 10.1038/s41467-017-01270-4.
- 578 [20] D. E. Neafsey, A. R. Taylor et B. L. MacInnis, "Advances and opportunities in malaria  
579 population genomics", *Nat. Rev. Genet*, vol. 22, no. 8, Art. no. 8, août 2021, doi :  
580 10.1038/s41576-021-00349-5.
- 581 [21] E. Patouillard, J. Griffin, S. Bhatt, A. Ghani et R. Cibulskis, " Global investment targets  
582 for malaria control and elimination between 2016 and 2030 ", *BMJ Glob. Health*, vol. 2,  
583 no. 2, p. e000176, mai 2017, doi : 10.1136/bmjgh-2016-000176.
- 584 [22] M. Malmberg *et al*, '*Plasmodium falciparum* drug resistance phenotype as assessed by  
585 patient antimalarial drug levels and its association with *pfmdr1* polymorphisms', *J.*  
586 *Infect. Dis.*, vol. 207, no. 5, pp. 842-847, mars 2013, doi : 10.1093/infdis/jis747.
- 587 [23] M. I. Veiga *et al*, 'Globally prevalent PfMDR1 mutations modulate *Plasmodium*  
588 *falciparum* susceptibility to artemisinin-based combination therapies', *Nat. Commun.*,  
589 vol. 7, no. 1, p. 11553, mai 2016, doi : 10.1038/ncomms11553.
- 590 [24] E. S. Bergmann-Leitner, P. M. Legler, T. Savranskaya, C. F. Ockenhouse, et E. Angov,  
591 'Cellular and humoral immune effector mechanisms required for sterile protection  
592 against sporozoite challenge induced with the novel malaria vaccine candidate CelTOS',  
593 *Vaccine*, vol. 29, no. 35, pp. 5940-5949, août 2011, doi : 10.1016/j.vaccine.2011.06.053.
- 594 [25] E. S. Bergmann-Leitner *et al*, 'Self-adjuvanting bacterial vectors expressing pre-  
595 erythrocytic antigens induce sterile protection against malaria', *Front. Immunol.*, vol. 4,  
596 p. 176, 2013, doi : 10.3389/fimmu.2013.00176.
- 597 [26] MalariaGEN *et al*, 'Pf7 : an open dataset of *Plasmodium falciparum* genome variation in  
598 20,000 worldwide samples', *Wellcome Open Res*, vol. 8, p. 22, Jan. 2023, doi :  
599 10.12688/wellcomeopenres.18681.1.
- 600 [27] D. A. Pfeffer *et al*, 'malariaAtlas : an R interface to global malariometric data hosted by  
601 the Malaria Atlas Project', *Malar. J.*, vol. 17, no. 1, p. 352, oct. 2018, doi :  
602 10.1186/s12936-018-2500-5.
- 603 [28] H. Ocholla *et al*, 'Whole-Genome Scans Provide Evidence of Adaptive Evolution in  
604 Malawian *Plasmodium falciparum* Isolates', *J. Infect. Dis.*, vol. 210, no. 12, pp. 1991-  
605 2000, Dec. 2014, doi : 10.1093/infdis/jiu349.
- 606 [29] A. E. Frosch, M. Venkatesan, et M. K. Laufer, 'Patterns of chloroquine use and  
607 resistance in sub-Saharan Africa : a systematic review of household survey and

- 608 molecular data', *Malar. J.*, vol. 10, no. 1, p. 116, mai 2011, doi : 10.1186/1475-2875-10-  
609 116.
- 610 [30] A. Paloyo et A. Reichert, "Biting Back at Malaria : Assessing Health-service Providers'  
611 Compliance with Treatment Guidelines", *Rev. Dev. Econ.*, vol. 21, no. 3, pp. 591-626,  
612 2017, doi : 10.1111/rode.12283.
- 613 [31] Office des Nations Unies contre la drogue et le crime, *Trafic de produits médicaux au*  
614 *Sahel*. Nations Unies, 2023. doi : 10.18356/9789210025409.
- 615 [32] S. D. Otienoburu *et al*, 'Selection of Plasmodium falciparum pfcr1 and pfmdr1  
616 polymorphisms after treatment with artesunate-amodiaquine fixed dose combination or  
617 artemether-lumefantrine in Liberia', *Malar. J.*, vol. 15, no. 1, p. 452, Sep. 2016, doi :  
618 10.1186/s12936-016-1503-3.
- 619 [33] C. Sisowath *et al*, 'In vivo selection of Plasmodium falciparum pfmdr1 86N coding  
620 alleles by artemether-lumefantrine (Coartem)', *J. Infect. Dis.*, vol. 191, no. 6, pp. 1014-  
621 1017, mars 2005, doi : 10.1086/427997.
- 622 [34] A. R. Taylor *et al*, 'Artemether-Lumefantrine and Dihydroartemisinin-Piperaquine Exert  
623 Inverse Selective Pressure on Plasmodium Falciparum Drug Sensitivity-Associated  
624 Haplotypes in Uganda', *Open Forum Infect. Dis.*, vol. 4, no. 1, p. ofw229, 2017, doi :  
625 10.1093/ofid/ofw229.
- 626 [35] P. Sondo *et al*, 'Artesunate-Amodiaquine and Artemether-Lumefantrine Therapies and  
627 Selection of Pfcr1 and Pfmdr1 Alleles in Nanoro, Burkina Faso', *PLoS ONE*, vol. 11, no.  
628 3, p. e0151565, Mar. 2016, doi : 10.1371/journal.pone.0151565.
- 629 [36] J. P. Gil et S. Krishna, " pfmdr1 (Plasmodium falciparum multidrug drug resistance  
630 gene 1) : a pivotal factor in malaria resistance to artemisinin combination therapies ",  
631 *Expert Rev. Anti Infect. Ther.*, vol. 15, no. 6, pp. 527-543, Jun. 2017, doi :  
632 10.1080/14787210.2017.1313703.
- 633 [37] A. Mahamar *et al*, 'Effect of three years' seasonal malaria chemoprevention on  
634 molecular markers of resistance of Plasmodium falciparum to sulfadoxine-  
635 pyrimethamine and amodiaquine in Ouelessebouyou, Mali', *Malar. J.*, vol. 21, no. 1, p.  
636 39, Feb. 2022, doi : 10.1186/s12936-022-04059-z.
- 637 [38] Observatoire des données sur les maladies infectieuses (IDDO), 'SP Molecular  
638 Surveyor', *Worldwide Antimalarial Resistance Network*, 02 février 2015.  
639 <https://www.wwarn.org/tracking-resistance/sp-molecular-surveyor> (consulté le 10 mai  
640 2023).
- 641 [39] A. Osborne *et al*, 'Characterizing the genomic variation and population dynamics of  
642 Plasmodium falciparum malaria parasites in and around Lake Victoria, Kenya', *Sci. Rep.*,  
643 vol. 11, no. 1, p. 19809, Oct. 2021, doi : 10.1038/s41598-021-99192-1.
- 644 [40] D. Abera, C. K. Kibet, T. Degefa, L. Amenga-Etego, J. L. Bargul, and L. Golassa,  
645 'Genomic analysis reveals independent evolution of Plasmodium falciparum populations  
646 in Ethiopia', *Malar. J.*, vol. 20, no. 1, p. 129, mars 2021, doi : 10.1186/s12936-021-  
647 03660-y.
- 648 [41] H. A. Babiker, S. J. Pringle, A. Abdel-Muhsin, M. Mackinnon, P. Hunt, et D. Walliker,  
649 'High-Level Chloroquine Resistance in Sudanese Isolates of *Plasmodium falciparum* Is  
650 Associated with Mutations in the Chloroquine Resistance Transporter Gene *pfcr1* and  
651 the Multidrug Resistance Gene *pfmdr1*', *J. Infect. Dis.*, vol. 183, no. 10, pp. 1535-1538,  
652 mai 2001, doi : 10.1086/320195.
- 653 [42] G. Mombo-Ngoma *et al*, 'High prevalence of dhfr triple mutant and correlation with  
654 high rates of sulphadoxine-pyrimethamine treatment failures in vivo in Gabonese  
655 children', *Malar. J.*, vol. 10, p. 123, mai 2011, doi : 10.1186/1475-2875-10-123.
- 656 [43] A. F. Cowman, M. J. Morry, B. A. Biggs, G. A. Cross et S. J. Foote, "Amino acid  
657 changes linked to pyrimethamine resistance in the dihydrofolate reductase-thymidylate

658 synthase gene of *Plasmodium falciparum*", *Proc. Natl. Acad. Sci. U. S. A.*, vol. 85, no.  
659 23, pp. 9109-9113, Dec. 1988, doi : 10.1073/pnas.85.23.9109.

660 [44] Organisation mondiale de la santé, *Stratégie technique mondiale de lutte contre le*  
661 *paludisme 2016-2030*. Genève : Organisation mondiale de la santé, 2015. Consulté : 12  
662 janvier 2023. [En ligne]. Disponible : <https://apps.who.int/iris/handle/10665/176712>

663 [45] W. Stone *et al*, 'Single low-dose tafenoquine combined with dihydroartemisinin-  
664 piperazine to reduce *Plasmodium falciparum* transmission in Ouelessebouyou, Mali : a  
665 phase 2, single-blind, randomised clinical trial', *Lancet Microbe*, vol. 0, no. 0, Mar.  
666 2022, doi : 10.1016/S2666-5247(21)00356-6.

667 [46] W. Stone *et al*, Pyronaridine-artesunate or dihydroartemisinin-piperazine combined  
668 with single low-dose primaquine to prevent *Plasmodium falciparum* malaria  
669 transmission in Ouélessébougou, Mali : a four-arm, single-blind, phase 2/3, randomised  
670 trial', *Lancet Microbe*, vol. 3, no. 1, pp. e41-e51, Jan. 2022, doi : 10.1016/S2666-  
671 5247(21)00192-0.

672 [47] S. O. Oyola *et al*, 'Whole genome sequencing of *Plasmodium falciparum* from dried  
673 blood spots using selective whole genome amplification', *Malar. J.*, vol. 15, no. 1, p.  
674 597, déc. 2016, doi : 10.1186/s12936-016-1641-7.

675 [48] E. L. Clarke, S. A. Sundararaman, S. N. Seifert, F. D. Bushman, B. H. Hahn et D.  
676 Brisson, "swga : a primer design toolkit for selective whole genome amplification",  
677 *Bioinforma. Oxf. Engl.*, vol. 33, no. 14, pp. 2071-2077, juil. 2017, doi :  
678 10.1093/bioinformatics/btx118.

679 [49] I. Letunic and P. Bork, 'Interactive Tree Of Life (iTOL) : an online tool for phylogenetic  
680 tree display and annotation', *Bioinformatics*, vol. 23, no. 1, pp. 127-128, Jan. 2007, doi :  
681 10.1093/bioinformatics/btl529.

682 [50] B. Q. Minh *et al*, 'IQ-TREE 2 : New Models and Efficient Methods for Phylogenetic  
683 Inference in the Genomic Era', *Mol. Biol. Evol.*, vol. 37, no. 5, pp. 1530-1534, mai 2020,  
684 doi : 10.1093/molbev/msaa015.

685 [51] P. Danecek et S. A. McCarthy, " BCFtools/csq : haplotype-aware variant consequences  
686 ", *Bioinformatics*, vol. 33, no. 13, p. 2037-2039, juil. 2017, doi :  
687 10.1093/bioinformatics/btx100.

688 [52] M. Gautier, A. Klassmann, et R. Vitalis, 'rehh 2.0 : a reimplement of the R package  
689 rehh to detect positive selection from haplotype structure', *Mol. Ecol. Resour.*, vol. 17,  
690 no. 1, pp. 78-90, 2017, doi : 10.1111/1755-0998.12634.

691 [53] K. Caye, T. M. Deist, H. Martins, O. Michel, et O. François, 'TESS3 : fast inference of  
692 spatial population structure and genome scans for selection', *Mol. Ecol. Resour.*, vol. 16,  
693 no. 2, pp. 540-548, 2016, doi : 10.1111/1755-0998.12471.

694 [54] S. F. Schaffner, A. R. Taylor, W. Wong, D. F. Wirth, and D. E. Neafsey, 'hmmIBD :  
695 software to infer pairwise identity by descent between haploid genotypes', *Malar. J.*,  
696 vol. 17, no. 1, p. 196, mai 2018, doi : 10.1186/s12936-018-2349-7.

697

## 698 FIGURE LEGENDS

699 **Figure 1. Structure de la population des isolats de *P. falciparum* collectés au Mali de 2007**  
700 **à 2020.** (A) Carte du Mali présentant le nombre de cas de *Plasmodium falciparum*  
701 nouvellement diagnostiqués pour 1 000 habitants en 2020 (échelle de couleurs) et indiquant les  
702 sites de collecte des études MalariaGEN (cercle) et des essais cliniques New Drug  
703 Combinations for *P. falciparum* Transmission Reduction (NECTAR) (triangle), colorés par le  
704 nom du village ou de la ville. Cette carte a été générée à l'aide du package R *tmap* (version  
705 3.3.3 ; <https://r-tmap.github.io/tmap/>) (B) Taux d'incidence de *P. falciparum* pour chaque site  
706 de collecte (par couleur) de 2000 à 2020. (C) Complexité des infections estimée par le  
707 coefficient de reproduction (métrique  $F_{ws}$ ) par échantillon, classé par site d'étude, la couleur  
708 indiquant l'année de collecte. La ligne de tendance grise en pointillés est à 0,95, les lignes en  
709 pointillés indiquent la valeur moyenne de  $F_{ws}$  par groupe. (D, E) Visualisation de 962 isolats  
710 maliens de *P. falciparum* par approximation et projection du manifold uniforme (UMAP),  
711 colorés par site et par année de collecte, respectivement.

712  
713 **Figure 2. Structure de la population des isolats maliens de *P. falciparum* dans le contexte**  
714 **des populations africaines.** (A) Visualisation de 962 isolats de *P. falciparum* à l'échelle de  
715 l'Afrique, dont 87 isolats collectés au Mali en 2019-2020 et 164 isolats maliens collectés en  
716 2007-2020, par approximation et projection uniformes des plis (UMAP). Les régions africaines  
717 où les isolats ont été collectés sont indiquées en couleur. (B) Arbre du maximum de  
718 vraisemblance du même ensemble de données, annoté par les isolats maliens de 2019-2020  
719 (anneau intérieur), la région africaine d'origine de l'échantillon (deuxième anneau), l'année de  
720 collecte (troisième anneau) et le pays ouest-africain de collecte (anneau extérieur). (C)  
721 Complexité des infections (coefficient  $F_{ws}$ ) par échantillon pour chaque échantillon, groupé  
722 par pays et séparant les isolats maliens 2019-2020 des isolats maliens 2007-2017. La ligne de  
723 tendance grise en pointillés est à 0,95, les lignes en pointillés indiquent la valeur moyenne de  
724  $F_{ws}$  par groupe.

725  
726 **Figure 3. Prévalence des polymorphismes nucléotidiques simples connus pour entraîner**  
727 **une diminution de la sensibilité aux médicaments.** Les fréquences des allèles mineurs  
728 (MAF) sont indiquées pour les isolats collectés de 2007 à 2020 au Mali pour les gènes associés  
729 à la résistance aux médicaments, y compris (A) *pfcr1*, (B) *pfmdr1*, (C) *pfhdfr* et (D) *pfhdps*. Les  
730 diagrammes circulaires en C et D représentent les fréquences auxquelles des combinaisons de  
731 mutants *pfhdfr* et *pfhdps* ont été observées dans les isolats de *P. falciparum* collectés en 2007,  
732 2013-2014, 2015-2017 et 2019-2020.

733  
734 **Figure 4. Recherche de preuves d'une sélection directionnelle récente.** Les diagrammes de  
735 Manhattan montrent l'analyse du (A) score d'haplotypes intégré (*iHS*) pour les SNP individuels  
736 dans la population du Mali 2019-2020 et le test *Rsb* inter-populations pour les haplotypes  
737 étendus comparant la population du Mali 2019-2020 à la (B) population du Mali 2007-2014 et  
738 à la (C) population du Mali 2015-2017.

739



740 **Figure 5. Proportions d'ascendance de mélange à l'échelle du génome pour les**  
741 **populations de *P. falciparum* sur l'ensemble du continent africain. (A)** Ascendances par  
742 isolat (colonnes) pour chaque pays, classées par année de collecte croissante. L'astérisque  
743 indique les isolats de Bandiagara au Mali. **(B)** Carte géographique des ascendances estimées  
744 en utilisant K=5 populations ancestrales sur le continent africain.  
745
